# Supplementary material for: A case study of wind farm effects using two wake parameterizationsin WRF (V3.7) in the presence of low level jets
Source: Copernicus journal article supplement (doi:10.5194/gmd-2020-358), 2020-12-22
Supplement: Supplementary file [file gmd-2020-358-AC3-supplement.zip]

# A case study of wind farm effects using two wake parameterizations in WRF (V3.7.1) in the presence of low level jets

Xiaoli G. Larsén<sup>1</sup> and Jana Fischereit<sup>1</sup>

<sup>1</sup>Wind Energy Department, Technical University of Denmark, Frederiksborgvej 399, Building 125, 4000 Roskilde, Denmark

**Correspondence:** Xiaoli G. Larsén (xgal@dtu.dk)

**Abstract.** While the wind farm parameterization by Fitch et al. (2012) in Weather Research and Forecasting (WRF) model has been used and evaluated frequently, the Explicit Wake Parameterization (EWP) by Volker et al. (2015) is less well explored. The openly available high frequency flight measurements from Bärfuss et al. (2019) provide an opportunity to directly compare the simulation results from the EWP and Fitch scheme with in situ measurements. In doing so, this study aims to compliment the recent study by Siedersleben et al. (2020) by (1) comparing the EWP and Fitch schemes in terms of turbulent kinetic energy (TKE) and velocity deficit, together with FINO<sub>1</sub> measurements and Synthetic Aperture Radar (SAR) data and (2) exploring the interactions of the wind farm with Low Level Jets. [This is done using WRF with the code bug fixed for advection of TKE, following Archer et al. \(2020\).](#)

Both the Fitch and the EWP schemes can capture the mean wind field in the presence of the wind farm consistently and well. ~~However, their skill is limited in capturing the flow acceleration along the farm edge.~~ TKE in the EWP scheme is significantly underestimated, suggesting that an explicit turbine-induced TKE source should be included in addition to the implicit source from shear. [The value of the correction factor for turbine-induced TKE generation in the Fitch scheme has a significant impact on the simulation results.](#) The position of the LLJ nose and the shear beneath the jet nose are modified by the presence of wind farms.

15 *Copyright statement.*

## 1 Introduction

Offshore wind energy has been developing fast in recent years. Consequently, wind farms are growing bigger and bigger in both capacity and spatial sizes. For instance in the North Sea, a farm can extend over tens of kilometers, ~~sometimes forms clusters and merge~~ with neighbouring farms, resulting in a cluster size of several thousands of km<sup>2</sup>, e.g. the Hornsea area (7240 km<sup>2</sup>); see [www.4coffshore.com](#) ~~4Coffshore~~ and [Díaz and Guedes Soares \(2020\)](#) for an overview of [the current status of offshore](#) wind farms. Wind turbines and farms extract momentum from the atmospheric flow and interact with it, causing reduction in wind speed and ~~increase changes~~ in turbulence in the wake regions. To assess such impact over areas with sizes of modern farm-clusters, mesoscale modeling has shown to be a useful tool in including synoptical and mesoscale wind variability.

Several mesoscale models have been used to study the wind farm effects, and the Weather Research and Forecasting (WRF) model (Skamarock et al., 2007) is the most-used mesoscale model for studying this subject, according to a recent review by Fischereit et al. (2021). There are mainly two kinds of methods to parameterize the effects of wind farms on the atmosphere: one is the implicit method that parameterizes the effects through an increase in surface roughness length, and the other is the explicit method that parameterizes the effects through an elevated momentum sink. In connection with the use of WRF, the wind farm parameterization (WFP) scheme (Fitch et al., 2012), called the Fitch scheme here (~~Fitch et al., 2012~~), and the explicit wake parameterization (Volker et al., 2015), called the EWP scheme here, are the two most commonly applied explicit wind farm parameterizations. Most ~~publications~~ previous studies used the Fitch scheme (Fischereit et al., 2021).

The Fitch scheme has long been implemented in WRF, which makes it convenient for users, regarding further development, investigation, application and validation. The EWP scheme, on the other hand, is not included in the official WRF repository and it has not been explored and validated as frequently. Studies comparing the two schemes on the calculation of the turbulent kinetic energy (TKE) are thus limited. ~~Volker et al. (2015, 2017)~~, Volker et al. (2015), Volker et al. (2017), Catton (2020), Pryor et al. (2020) and Shepherd et al. (2020) are the few, with the first ~~two~~ three addressing offshore wind farms, and the last two onshore wind farms. These studies consistently show that the Fitch scheme ~~provides~~ generates significantly larger wind-farm-induced ~~TKE significantly larger TKE values~~ than the EWP scheme does. The two schemes differ with respect to their treatment of turbine-induced forces in the momentum equation as well as to their treatment of wind farms as a source of TKE. In the Fitch scheme, the turbine-induced force is represented by a local thrust force (as a function of the thrust coefficient) acting on the turbine-swept area. In the EWP scheme, a grid cell averaged drag force is applied that accounts for a sub-grid scale vertical wake expansion based on the concept from Tennekes and Lumley (1972). With respect to TKE, in the Fitch scheme wind turbines are treated as an explicit source of TKE. By neglecting mechanical losses, turbine-induced TKE is a function of the difference between the power and the thrust coefficients. While in the EWP scheme, no explicit source term is considered for TKE and the turbine-induced TKE arises solely from the shear production in the wind farm wake.

TKE describes the fluctuation of kinetic energy and it is related to the turbulence, which is a key wind-energy application parameter. The modelling of wind-farm-induced TKE from the Fitch scheme has been previously evaluated in a number of case studies with measurements from profiling lidars (Lee and Lundquist, 2017a, b). With considerable uncertainties embedded with the lidar technique, Lee et al. showed that TKE from the Fitch scheme can capture the general pattern from the measurements. Siedersleben et al. (2020) (hereinafter S2020) used in situ high-frequency airborne measurements to evaluate TKE from the Fitch scheme in WRF for three case studies. They found that the Fitch scheme overestimates the TKE on the upwind side of the wind farm and underestimates it on the downwind side. They also noted that capturing the background meteorology is crucial to evaluate the performance of the scheme, which they managed only within their case study II.

During the case study II of S2020, ~~there were~~ Low Level Jets were present over the area. LLJs over the Southern North Sea are mostly associated with relatively warm continental air being advected over cooler sea surface, where a stable internal boundary layer develops, causing quasi-frictional decoupling and an acceleration of air mass. The phenomena are rather common in coastal regions and they have been studied in a long list of literature, (e.g. Smedman et al., 1993, 1995; Dörenkämper et al., 201 ; Wagner et al. (2019) showed that LLJs are a common phenomenon in ~~this~~ the Southern North Sea area: by analysing of one-

and-an-half year of campaign measurements using lidar and a passive microwave radiometer measurements over the Southern  
60 North Sea, they found that ~~LLJs occurred on about~~ during 65% of the ~~days during the campaign~~ time, LLJs occurred for a  
certain period on these days. Flow from the southwest (such as case II) is one of the favourable conditions in forming LLJs in  
this area. Wagner et al.'s data show that LLJs in association with flow from the south and the southwest typically have ~~the a~~  
jet nose (wind speed maximum) height ~~from between~~ 200 m to and 300 m. This is expected to have non-negligible impact on  
the turbine performance, which is ~~related to not only~~ not only related to the increased wind ~~resource~~ resources, but also to the  
65 unusual vertical distribution of wind shear, with enhanced shear beneath the jet nose and negative shear above it. Thus, turbu-  
lence ~~will also be~~ is also affected, causing considerable additional uncertainties in the estimation of relevant key parameters ;  
~~such as loads~~ such as turbulence intensity, gust and loads. It has not yet been documented in the literature how the structure of  
LLJ is affected by the presence of large wind farms. There also lack published studies showing ~~how the~~ wind farm wakes ~~are~~  
~~affected by~~ in the presence of LLJs.

70 ~~This study takes advantage of the open source flight data from Bundesnetzagentur (2019) and Bärfuss et al. (2019a), and~~  
~~follows up on the recently publication by S2020. The purpose~~ The purpose of this study is thus two folds: ~~(1) First, it refers to~~  
what S2020 pointed out: “For comparison, it would be interesting to simulate case study II with the wind farm parameterization  
of Volker et al. (2015)”. With the availability of the high frequency velocity measurements published in Bärfuss et al. (2019a)  
, this study contributes to this knowledge gap through revisiting the case study II in S2020 and comparing the wind farm  
75 effects modelled through the EWP and the Fitch schemes ~~in the WRF modeling~~. This study will thus also be the first to use  
measurements to verify the calculations of TKE using in the EWP scheme. ~~(2) Studying~~ Second, we study “case study II” from  
14 Oct 2017 in S2020 to examine the the wind characteristics under the impact of both wind farm wakes and LLJs.

The methods used here are introduced in ~~the next section~~ Sect. 2, including the measurements and the WRF model setup.  
The results will be presented in Sect. 3, followed by discussions in Sect. 4 and conclusions in Sect. 5.

## 80 2 Method

The case study from 14 Oct 2017 ~~will be modeled here using WRF applying is modeled using WRF v3.7.1 with~~ both the EWP  
and Fitch ~~scheme~~ wind farm parameterization schemes; details of the model setup are given in Sect. 2.2. The model output will  
be analyzed together with various measurements in line with S2020. These measurements are introduced in Sect. 2.1. In this  
study, time in both the measurements and the modeled data is presented in UTC.

### 85 2.1 Measurements

Case study II from S2020 took place on 14 Oct 2017. Along with warm air advection from land to sea, LLJs formed. Wind  
farm wakes were generated, which is obvious from the Synthetic Aperture Radar (SAR) data as the streaks of reduced wind  
speed, as shown in their Fig. 4a, which is re-produced here in Fig. 1-

a. Three types of measurements are used here to study this event. ~~The first is the open access measurements, which will be~~  
90 described individually in the following.

The first are the publicly available airborne measurement data published in Bärffuss et al. (2019a), Lampert et al. described in Lampert et al. (2020) and Platis et al. (2018), and analyzed in S2020. The measurements are briefly introduced here and their details can be found in these publications. The flight track on the 14 Oct 2017 is re-produced here as in Fig. 2. The transect-flight over the wind farm is indicated in cyan-green and labelled by “a”. The colored blocks labeled with digits 1 to 6 indicate profiling flights along the track from the surface to about 600 m. The start and end time of each profiling flight are provided in Table 1.

The flight data include: (1) Vertical profiles of a number of variables, including temperature  $T$  (K), pressure  $P$  (hpa), and the along-wind, cross-wind and vertical-wind components,  $u$ ,  $v$  and  $w$ , respectively, from these profiling flights from the surface to about 600 m. Following S2020, we calculated the potential temperature  $\theta$  from temperature  $T$  and pressure  $P$  using  $\theta = T \cdot (P_0/P)^{0.2859}$ , where  $P_0 = 1000$  hPa. These profile data provide background information, and are not affected by wind farm wakes (see Fig. 2 for their position relative to the farms during the flight period). We call these data “profile-flight”; (2) Horizontal flight data for  $u$ ,  $v$  and  $w$ , among other variables. In contrast, the transect flight above the wind farm at 250 m; these data are height is affected by the wind farms farm. We call these data “transect-flight”.

We downloaded the flight data from Bärffuss et al. (2019a). The data include, among others, temperature  $T$  (K), pressure  $P$  (hpa), and the along-wind, cross-wind and vertical-wind components,  $u$ ,  $v$  and  $w$ , respectively. Following S2020, we calculated the potential temperature  $\theta$  from temperature  $T$  and pressure  $P$  using  $\theta = T \cdot (P_0/P)^{0.2859}$ , where  $P_0 = 1000$  hPa. The flight measurements are sampled at a frequency of 100 Hz at an aircraft ground speed of  $66 \text{ ms}^{-1}$ , corresponding to a horizontal resolution of 0.66 m (Platis et al., 2018). The flights over Godewind 1 were conducted at an elevation of 250 m, slightly above the rotor top (187 m, with hub height 110 m and diameter 154 m (S2020), see also Table 4). For the analyses of the vertical profile, we averaged the profile-flight data over a vertical interval of 10 m. For the transect-flight data, TKE is calculated following  $TKE = 0.5 \cdot (\sigma_u^2 + \sigma_v^2 + \sigma_w^2)$ , where  $\sigma_u$ ,  $\sigma_v$  and  $\sigma_w$  are standard deviation of the three wind components. The calculation is done over windows standard deviations are derived over data length of both 2 km and 1.5 km. The choice of the window data length is made following the argument in Platis et al. (2018) for the turbulence length scales, where they used. They used a data length of 1.5 km. Given the background wind speed approximately  $10 - 15 \text{ ms}^{-1}$ , the time scales over both 2 km and 1.5 km are on the order of a couple of minutes, which is a reasonable integral time scale for separating boundary-layer turbulence and external fluctuations. Our analyses was were made using both scales 2 km and 1.5 km, but are presented only for 2 km, in order to match the spatial horizontal resolution of the WRF model; details are given in Sect. 3.

Wind farms included in the WRF modeling are shown in on a larger map in Fig. 3a, and the details of these farms are provided in Table 4. Figure 3b is a close-up of Fig. 3a over the marked area, with the two closest consecutive rows of WRF model grids shown over the Godewind 1 farm (in black and red), covering the flight track-a (in cyan-green). An additional row of the WRF grid points (in blue-purple) is chosen east of the farm in the wake affected area. These three rows are denoted as transect-black, transect-red and transect-blue transect-purple according to the colors in our analysis. They will be used for analyzing the transect distribution of wind speed and TKE.

The second measurement type is dataset originates from the FINO 1 met mast. In Fig. 3b, the location of the FINO 1 mast is marked with  $F1$ . Note that with for our studied case, with a wind direction from about  $240^\circ$ , FINO 1 is in the wake of

~~the upstream (Fig. 5), the flow passes the wind farm Borkum Riffgrund before reaching F1, resulting in reduced wind speed downwind of the farm, including at FINO 1 (see Fig. 1a). The 10-min values of wind speed from 30 m to 100 m, and wind direction from 30 m to 90 m on 14 Oct are used from FINO 1 utilized in this study.~~

The third measurement type is the SAR data. The wind farm wakes can be seen as reduced wind speed in Fig. 1a, where the wind field was retrieved from ENVISAT SAR at 17:17 UTC on 14 Oct 2017. The retrieval uses the empirical relationship between the 10-m wind speed and the radar backscatter that depends on the local wind-generated wind waves (Valenzuela, 1978; Hersbach et al., 2007). The spatial resolution of the SAR data shown in Fig. 1a is about 500 m. Fig. 1a is made from more than one SAR scenes; even though the farm wake pattern is continuous across scenes, there seems to be an artificial change in wind speed east of about 6.5°E, which was also present in S2020. Due to these uncertainties, the SAR data will only be analyzed qualitatively.

## 2.2 Modeling

~~LLJs over the Southern North Sea are mostly associated with relatively warm continental air advected over cooler sea surface, where a stable internal boundary layer develops, causing quasi-frictional decoupling and an acceleration of air mass. The phenomena are rather common in coastal regions and they have been studied in a long list of literature, e.g. Smedman et al. (1993, 1995); Wa~~  
~~It is challenging to accurately simulate~~ Important elements for accurately simulating LLJs using WRF, ~~where important elements~~ include model domain configuration, initialization and boundary forcing data, horizontal and vertical spatial resolutions, PBL schemes etc. ~~(Nunalee and Basu, 2014; Wagner et al., 2019; Kalverla et al., 2019; Siedersleben et al., 2020; Tay et al., 2020)~~. ~~Different studies have~~, as explored in e.g. Nunalee and Basu (2014); Wagner et al. (2019); Kalverla et al. (2019); Siedersleben et al. (2020). ~~The studies~~ suggested different best candidate elements for setting up WRF choices for the WRF setup in order to capture the LLJ characteristics. ~~Our choices of these key elements are in agreement with the general recommendation~~ In our setup, we followed the general recommendations in literature. This includes (1) ~~These studies recommend a~~ horizontal spatial resolution of 2 km in the innermost model domain; (2) ~~and~~ a large number of vertical model levels, here e.g. 80 with 21 in the lowest 200 m; (3) ~~They also suggest that ERA 5 data (ERA5) is good as the~~ initial and boundary forcing using ERA-5 data; (4) ~~MYNN PBL scheme, which was shown to outperform the others in Tay et al. (2020), while in Nunalee and Basu (2014), MYNN performed fine but the best candidate was QNSE~~. ~~Since~~, Some studies show the MYNN Planetary Boundary Layer (PBL) scheme outperforms other schemes (Tay et al., 2020) and some other studies suggest that MYNN PBL performs fine but not as good as QNSE scheme (Tay et al., 2020; Nunalee and Basu, 2014). However, since the Fitch scheme can only be used in connection with MYNN to calculate TKE developments, ~~this schemewas usedwe were forced to use the MYNN PBL scheme.~~

We use WRF version 3.7.1 to simulate this case. The model contains three nested domains (Fig. 4) and the spatial resolutions are 18, 6 and 2 km for domain I, II and III, respectively. Following the suggestion by S2020 and in agreement with other sensitivity studies (Tomaszewski and Lundquist, 2020; Lee and Lundquist, 2017a), we use 80 vertical layers with 21 layers below 200 m with a thickness of about 10 m. ~~We use MYNN2.5 Planetary Boundary Layer (PBL) scheme Nakanishi and Niino (2009); Thompson microphysics scheme Thompson et al. (2004); RRTMG long wave and short wave radiation physics schemes Iacono et al. (2008); The Kain-Fritsch cumulus scheme (Kain and Fritsch, 1993) is used for domain I but it is deactivated for domain II and III. The~~

160 ~~Corine land use data from 2017 are used. ERA-5 data on pressure levels are used as the initial and boundary forcing for WRF. In addition, the OSTIA SST data, which is produced daily at a resolution of  $(1/20)^\circ$ , approximately 5 km (Stark et al., 2007) was used. Table 2 lists the parameterization schemes regarding PBL scheme, microphysics, radiation, land use, sea surface temperature (SST) and forcing data.~~

165 ~~The development of LLJs has shown to be sensitive to the domain configuration. In our experiments, LLJs failed to develop when the southern land area included in the domain was too small, likely caused by an unsuccessful development of the stable internal boundary layer associated with warm air advection. This problem is solved by including more area in the model domain.~~

The WRF simulation starts at 6:00 on 14 Oct 2017 and runs to the end of day. The simulation captures the development of LLJs and it is sufficiently long to be compared to the available measurements. The ~~simulation has been run in three modes, one with the Fitch scheme, one with the EWP scheme and one without wind farms (NWF). The model~~ outputs are 10-min instantaneous values from each time step, including the longitudinal wind component  $U$ , the meridional wind component  $V$ , potential temperature  $\theta$  and  $QKE$ , from which we further calculated the wind speed, the wind direction and TKE ( $0.5 \cdot QKE$ ).  
170 ~~In connection~~

~~The simulation has been run in three modes, one with the Fitch scheme for the wind-farm-induced TKE, there are two options: one with the advection of it turned off and one with it turned on. For most studies in the literature EWP scheme and one without wind farms. Table 3 shows the complete list of all simulations and how each simulation is referenced in the text.~~

175 ~~In WRF, advection of TKE can be turned either on or off. Several studies (Tomaszewski and Lundquist, 2020; Siedersleben et al., 2020), including S2020, the advection of the wind-farm-induced TKE has been set to be off, due to explored the impact of deactivated and activated TKE advection in connection with the Fitch parameterization. However, a bug in WRF that would give unrealistic values, versions 3.5 to 4.2.1 lead to an incorrect integration of the TKE generated by wind farms into the overall TKE field as reported in Archer et al. (2020). Archer et al. (2020) fixed this bug and experimented with a coefficient  $C_{TKE}$ . In addition to providing a fix for this bug, they also introduced a correction factor  $\alpha$ , so that the wind-farm-induced TKE factor, in connection with the advection scheme. The factor  $C_{TKE}$  in the Fitch scheme is now calculated as  $C_{TKE} = \alpha(C_T - C_P)$ . Thus,  $\alpha$  is used to adjust the magnitude of TKE as described in the Fitch scheme and it is recommended to be less turbine-induced TKE. Based on their comparisons of a single turbine with Large Eddy Simulations, Archer et al. (2020) recommended  $\alpha$  to be set to a value smaller than 1 to respond to their Large Eddy Simulation experiments. In this study, when, with 0.25 being the default value.~~

185 ~~We integrated the bug-fix in WRF v3.7.1 as described in the zenodo-repository related to our study (?). Using this version, we conduct three experiments using the Fitch scheme, the default uses farm-induced TKE advection off, with  $C_{TKE} = 1$ , which is the same as in S2020. Further experiments using this TKE advection on with  $C_{TKE} = 0.25$  and 1 are briefly compared to the default and measurements (see Section 4). Since EWP does not have a similar term in the TKE equation that is a function of turbines, this issue is absent. advection turned off (denoted as Fitch-off, see Table 3), and advection turned on with  $\alpha = 1$  (Fitch-on-1) and turned on with  $\alpha = 0.25$  (Fitch-on-0.25). For the experiments with EWP and no wind farm, TKE advection is turned on by default, denoted as EWP and NWF, respectively. Most analysis will be based on the above-mentioned five simulations. However, in the discussion (Sec. 4) we also comment on calculations from WRF before the bug-fix (Fitch-on-old).~~



195 in order to have a rough understanding of relevant results from the literature. For the sake of completeness, the simulations with the EWP scheme and no wind farms are also done with advection turned off, and they are denoted as EWP-off and NWF-off, respectively. The results of EWP-off and NWF-off will only be discussed briefly for comparison.

~~The development of LLJs is sensitive to the domain configuration. In our experiments, LLJs failed to develop when the southern land area was too small, likely caused by an unsuccessful development of the stable internal boundary layer associated with warm air advection. This problem is solved by increasing the land area in the southern part.~~

200 ~~The turbine information includes~~ To include the effects of wind farms in the simulations, information on turbine location, hub height, rotor diameter, power coefficient and thrust coefficient are required. In our simulation, the locations of the turbines from the wind farms shown in Fig. 3 are obtained from three different sources: (1) Bundesnetzagentur (2019) for most German wind farms (2) Energistyrelsen (2020) for Danish wind farms and (3) for other wind farms not included in these two data sets  
205 turbine locations have been derived from SAR images in (Langor, 2019) and manually corrected to fit the wind farm shapes and turbine numbers from emodnet (Emodnet, 2020). For the simulations in this study only wind farms built before 2018 are included in accordance with the ~~simulated date measurement time~~ (Table 4). In S2020, three types of turbine are used, with Siemens SWT 6.0-154 for Godewind 1 and 2, Siemens SWT 3.6-120 for Meerwind Süd Ost and Senvion 6.2 for OWP Nordsee Ost (see Table 3 in S2020). They used the thrust and power coefficients of Siemens SWT 3.6-120 onshore for all  
210 turbines implemented in the simulation. In our study, we used the a different turbine type for each wind farm from sources above ~~(according to the sources introduced above as far as they are available to us. For some wind farms, e.g. Alpha Ventus or BARD Offshore, we could not obtain the thrust and power coefficients for the actual turbine. Therefore a similar model was used instead. In Table 4 )~~ the wind farms are listed with the turbine model used in the simulations. Power and thrust curves for each turbine have been taken from Langor (2019) or from WASP (<http://www.wasp.dk/>). We used an initial length scale of  
215 1.6 for the EWP scheme related to the subgrid scale vertical wake expansion. We also conducted simulations using the length scale 1.5 and 1.7 and found that the difference is negligible. In the literature, the length scale values 1.5 and 1.7 have been used (Badger et al., 2020; Volker et al., 2017, 2015) and Volker et al. (2015) shows that the difference of using the values between 1.5 and 1.9 is negligible.

### 3 Results and Analysis

#### 220 3.1 Low Level Jets

With warmer air moving from the land over the sea in the direction of about  $240^\circ$ , a stable boundary layer (SBL) developed over the sea, as can be seen from the profile-flight data, shown in Fig. 5a and c. The modeled potential temperature  $\theta$  profiles consistently suggest the presence of the SBL, though the increasing of  $\theta$  with height within the lowest 300 m is slightly smaller than the measurements. The direction veering is well captured in the lowest 300 m. Above 300 m, the measurements suggest  
225 a persistent wind direction of about  $250^\circ$ , while the modeled wind vector continues turning an additional  $10 - 20^\circ$ . LLJs are observed during these profiling flights, as shown in ~~Fig.~~ the distribution of wind speed with height in Fig. 5g; note that the time and location of these flights are different (Table 1 and Fig. 2). Fig. 5g clearly suggests that the wind structure of the LLJs

is highly variant over time and space. This is also true ~~with the modeled LLJs corresponding to these profiling flights for the corresponding modeled LLJs~~, see Fig. 5g. Several of the measured wind speed profiles have more than one jet nose, with the lowest ones beneath 200 m and the highest ones at 350 – 400m, ~~suggesting the presence of multiple internal boundary layers in m. This suggests a variation of the internal boundary layer in time and space, in~~ associated with the flow from the land. The model captures the jets at the level ~~300-200~~ – 400 m. At the same time, both measured and modeled TKE decrease generally with height, with the modeled values being larger, see Fig. 5e and f. While the mean TKE values from the measurements are relatively small, their fluctuations are two times larger. These are not shown here in order to avoid too much noise in the plot. As none of these profile-flight data are affected by wind farm wakes, the modeled data are the same for NWF, the Fitch and the EWP schemes. Therefore, in Fig. 5, only results from ~~the EWP scheme-EWP~~ are shown.

With the wind from the southwest direction, at the FINO 1 site, the LLJ structure is affected by the wake effect ~~from upstream originating from the~~ Borkum Riffgrund wind farm. Figure 6 shows the wind speed profiles at FINO 1 during three 1-h periods, with two during the flight periods (Fig. 6a and b) and one later in the afternoon (Fig. 6c). ~~Six~~ ~~In each figure we show in addition to the measurements (OBS), five simulations from NWF, EWP, Fitch-on-1, Fitch-on-0.25 and Fitch-off. Each profile is a 10-min modeled data during one hour from three simulation modes are plotted together with the 10-min measured value, for both measurements and model data.~~ The measurements only reach up to 100 m, which is way beneath the jet noses. ~~The following characteristics can be observed from Fig.6: (1) The Fitch scheme~~ From Fig. 6, it can be observed that the Fitch scheme in general results in smaller wind reduction below ~~upwind hub height hub height than the EWP scheme~~, but larger wind speed reduction ~~between hub height up to the rotor top height than the EWP scheme~~ above hub height. Thus the average values from the surface to the rotor top height are comparable between the two schemes ~~-(2) The in this situation. For these wind profiles, Fitch-on-1 and Fitch-off are rather similar, whereas Fitch-on-0.25 shows a distinct kink at rotor top height, corresponding to considerably larger wind reduction during 14:00 to 16:00. The kink is present in all three Fitch simulations, but it is absent in EWP. From Fig. 6, it is also clear that the~~ wind speed reduction is not limited to the rotor area, but up to the jet nose; ~~(3) The position of the LLJ nose is higher in the presence of the farm wake effect according to the WRF modeling; (4) There is a kink in the wind profile from the Fitch scheme, which is absent in the results from the EWP scheme. The measured profiles are closer to the EWP scheme.~~ Overall, the EWP scheme provides larger shear and better values at measurement heights for Fig. 6a and b when the jet nose is high, but ~~they are in better agreement with~~ the Fitch scheme ~~describes better the profiles at the measurement heights~~ for Fig. 6c when the jet nose is low. It is also worth noting that the position of the LLJ nose is higher in ~~the presence of the farm wake effect according to the WRF modeling.~~

These characteristics are also examined for ~~another location, here~~ point A as shown in Fig. 3. Point A is inside the Godewind 1 wind farm area and ~~it is on top part~~ of the flight leg, transect-a. ~~The transect-flight data at the closest time (number four in Table1, Data at 15:01–15:11)00 is used, which is in between the data used for Fig. 6a,b and close to flight number four (Table 1). Here, both the wind speed profiles and the TKE profiles are compared between the five simulations in Fig. 7a and Fig. 7b, averaged over a distance of 2 km, are plotted on top of the profiles at  $z=250$  m as star for wind speed (Fig.7a) and TKE (Fig.7b), where the corresponding wind speed and TKE from the three simulation modes are shown,~~ respectively. The above descriptions of the wind speed for ~~FINO1-FINO 1~~ are also true for point A, as can be seen in Fig. 7a. ~~Here the EWP~~



~~scheme provides a better estimate of mean wind speed.~~ In the absence of wind farms (NWF), TKE decreases with height, as in Fig. 5. In the presence of farm wakes, ~~with both schemes, TKE increases both for EWP and Fitch. TKE values increase with height up to the rotor top height and then decreases again to a value matching the free stream value. TKE from the Fitch scheme increases significantly with height, and for the value~~ With the TKE advection turned on, TKE at point A, it is overestimated in comparison with the flight data. Over is smaller than without advection. TKE in Fitch-on-1 is only slightly smaller than TKE in Fitch-off, whereas TKE in Fitch-on-0.25 is considerably smaller due to the smaller TKE source. This figure also shows that, over the rotor area, the variation of TKE with height from the EWP scheme is smoother and the magnitude of TKE significantly smaller in comparison with the Fitch scheme (Fig. 7b). There is considerable fluctuation of the measured TKE with time and space; the variation of the measured and modeled TKE along the flight track will be further analyzed in section 3.2.

### 3.2 Wind farm wake effects

The vertical profile of wind speed at the FINO 1 site (Fig. 6) clearly shows the wake effect from the upstream Borkum Riffgrund wind farm. Figure 8 compares the measured and modeled time series of wind speed and wind direction at FINO 1. Here the modeled values at FINO 1 are weighted between two closest grid points (one inside and one outside the farm) according to the distances between the grid points and the mast location. This is done because the closest grid point to FINO 1 is inside the farm, while in reality, FINO 1 is on the edge, and outside of the farm. The three model modes (NWF, Fitch, EWP) provide the same wind direction calculations at 90 m which follow the measurements well until late in the afternoon when the modeled winds are more westerly than in reality (Fig. 8b). The wake impact on the wind speed at 100 m is clear, as shown in Fig. 8a. Between 12:00-24:00 and 24:00 on 14 Oct, the difference between the measured and ~~NWF-modeled modeled~~ mean wind speed,  $\langle \Delta U \rangle = -1.41 \text{ m s}^{-1}$ , the standard deviation of the difference  $STD = 0.56 \text{ m s}^{-1}$ , and the absolute difference  $\langle |\Delta U| \rangle = 1.41 \text{ m s}^{-1}$ , respectively. Comparison between the measurements and the Fitch scheme gives  $\langle \Delta U \rangle = 0.30 \text{ m s}^{-1}$ ,  $STD = 0.46 \text{ m s}^{-1}$  and  $\langle |\Delta U| \rangle = 0.44 \text{ m s}^{-1}$ . Comparison between the measurements and EWP scheme gives  $\langle \Delta U \rangle = -0.2 \text{ m s}^{-1}$ ,  $STD = 0.52 \text{ m s}^{-1}$  and  $\langle |\Delta U| \rangle = 0.45 \text{ m s}^{-1}$ . This  $\langle |\Delta U| \rangle$  are shown in Table 5 for the five simulations. By subtracting  $\langle \Delta U \rangle$  of EWP from that of NWF, it suggests that, during this period, the wake effect is on average about ~~1.71-1.2~~ 1.71-1.2  $\text{m s}^{-1}$  when calculated using the ~~Fitch scheme and 1.21~~ Fitch scheme and 1.21 EWP scheme. Similarly, it is 1.7  $\text{m s}^{-1}$  when calculated using ~~the EWP scheme.~~ Without taking wind farm wake ~~Fitch-on-1. Fitch-on-0.25 gives rather significantly larger wind reduction, which is about 2 m s<sup>-1</sup>. Without taking the wind farm wakes into account, WRF overestimates the wind speed at 100 m by 1.41 m s<sup>-1</sup>. The Fitch scheme Overall, the Fitch scheme slightly overestimates and the EWP scheme slightly underestimates  $\langle \Delta U \rangle$ ;~~ with the EWP providing a slightly smaller bias.

The wind farm wakes are visible from the SAR image at 17:17 UTC from Fig. 1a. The corresponding 10-m wind speed from WRF using ~~the Fitch and the EWP schemes~~ Fitch-on-0.25, Fitch-on-1 and EWP are shown in Fig. 1b ~~and c, c and d,~~ respectively. Even though WRF misses detailed patterns as in the SAR image (e.g. streaks and waves), the farm wake patterns are consistent. Comparing the wind speeds in the wake shadows and the surrounding free stream, both SAR data and WRF output suggest a wind reduction of about  $1.5 - 2 \text{ m s}^{-1}$ , with the wind speeds in the farm wakes in the range of  $7 - 8 \text{ m s}^{-1}$ , and the free stream wind speeds in the range of  $9 - 10 \text{ m s}^{-1}$ . To make the wind farm wake effect more visible, the difference of the

wind speed in Fig. 1b and c to the NWFs shown as 10-m wind speed deficit at 10 m between EWP and NWF, between Fitch-off and NWF-off, between Fitch-on-1 and NWF and between Fitch-on-0.25 and NWF are shown in Fig. 9a (Fitch-NWF) and b (EWP-NWF), respectively. Here one can see that the wake-caused wind speed reduction at 10 m is about  $2.5 \text{ ms}^{-1}$  inside the farm, and a reduction of  $0.5 \text{ ms}^{-1}$  can extend between ten and a hundred of kilometers downwind, superimposing with wakes from other wind farms. At 17:17, the SAR 10-m wind speed at the FINO\_1 site is about  $8 \text{ m s}^{-1}$ , and the WRF outputs, both from the Fitch and the EWP schemes, are also about  $8 \text{ m s}^{-1}$ . Note that in a short distance downwind of the wind farms, the surface wind at 10 m from the Fitch scheme suggests a slight speedup, see the brighter color in the farm wake shadows in Fig. 1b and the white color in Fig. 9a. This b, c and d. This speedup is a phenomenon that deserves further investigation (Djath et al., 2018), but it is beyond the scope of this study. Moreover, all four wind farm simulations in Fig. 9 suggest a presence of reduced wind speed in front of the farms. This is also often called a global blockage effect. Such an effect is most obvious for wind farms with free upstream flow and it is more obvious in the Fitch simulations.

The transect-flight data over transect-a are plotted in Fig. ??a and b 10, for wind speed and TKE at 250 m (a,c) and TKE (b,d) at 250 m, respectively. To improve the visibility of individual model scenarios, Fig. 10a and b compare measurements, NWF, EWP and Fitch-off, and Fig. 10c and d compare measurements, Fitch-on-1, respectively Fitch-on-025 and Fitch-off. There are altogether six flights over transect-a between approximately 14:20 and 16:10 (Table 1), each lasted approximately 10 minutes. The flight data are at 250 m above sea level, averaged here. We averaged the flight data over a spatial distance of both 2 km (same as the WRF spatial resolution) and 1.5 km (same as in S2020). The results of using the two averaging distances are similar; the one using 1.5 km provides slightly more fluctuation. Here In Fig. 10 we only show the results using 2 km. The corresponding model data at 250 m over transect-red in Fig. 3 from 14:00 to 16:00, covering the flight periods, are plotted (Fitch, EWP and NWF). The modeled data are 10-min instantaneous values, plotted every half an hour. Compared Based on Fig. 10a and c, compared to the ambient flow, there is a deficit in wind speed at 250 m above the wind farm Godewind 1, due to the wind farm effects. Such a wind deficit is almost  $3 \text{ m s}^{-1}$  in the flight data, and it is also about 3 only about  $2 \text{ m s}^{-1}$  in the modeled data using the Fitch scheme, but only about 2 EWP, about  $3 \text{ m s}^{-1}$  in the modeled data using the EWP scheme Fitch-on-1, slightly smaller reduction for Fitch-off and even smaller reduction for Fitch-adv-0.25.

As a result of the wind farm parameterizations, above the wind farm high TKE values are observed when compared with ambient values, which are almost zero (Fig. ??b-10b and d). When no wind farms are included in the modeling, there is no systematic difference in TKE across transect-a, see the black curves. Parametrizations in Fig. 10b. Parameterizations of the wind farms result in increased TKE over the farm. At 250 m, the Fitch Fitch-on-1 scheme provides TKE inside the range of the measured values, though with large underestimation at the southern edge of the farm and with comparable magnitude at the northern edge of the farm. The profiles at point A (Fig. 7b), which is approximately in the center of transect-a and transect-red (Fig. 3), show that the TKE values are highest close to hub height and decrease above it. At point A, the TKE value simulated by the Fitch scheme is about Fitch-on-1 and Fitch-off schemes are about  $2.1 - 2.3 \text{ m}^2 \text{ s}^{-2}$  at rotor top height, which is about 40% higher than that the values at 250 m. For transect-a, the TKE values from the EWP scheme are considerably smaller, being only about  $1/3 - 1/4$  of the values from the Fitch scheme, and are thus significantly underestimated compared to the flight measurements. The overall TKE magnitudes across the transect from Fitch-on-1 and Fitch-off are also

comparable. Due to the activated TKE advection, Fitch-on-1 provides a more even-distribution across the transect compared to Fitch-off. Fitch-on-025, which also shows the even distribution of TKE across the transect, has significantly lower values of TKE compared to Fitch-on-1, Fitch-off and measurements.

335 One can notice the speedup in the flow in the flight measurements on the southern edge of the farm in Fig. ~~??a-10a and c~~, as also pointed out in S2020; see the bump of wind speed at 250 m at latitude before 54°N. WRF does not capture this phenomenon with either scheme. The abrupt increase in TKE in the same area (Fig. ~~??10b~~) is likely related to this flow acceleration and is also missing in the WRF results.

The vertical distributions of the wind speed and TKE along transect-a are shown in contour lines in Fig. 11 (~~latitude-versus height~~) as latitude (from south to north) versus height, for 15:30 for both ~~Fitch and EWP~~ EWP and three Fitch simulations, as an example. The LLJs are visible here in Fig. 11 (~~left column~~) with the wind speed maximum height between ~~~300-200~~ and 500 m. The largest difference in the wind speed between the Fitch and EWP schemes is over the farm beneath the rotor top, with Fitch simulating on average larger wind speed reductions from the wind farm wake effect (Fig. 11a and ~~bc,e,g~~).

~~The right column in Fig. 11 e and d show shows~~ that, the largest TKE values are located at a height between hub height and rotor top ~~with the Fitch scheme, and they are located closer to the rotor top with the EWP scheme. The Fitch scheme simulates~~. ~~The three Fitch simulations correspond to~~ several times larger TKE values than the EWP scheme, with the largest difference over the wind farm area. An increase in TKE is notable up to double the height of the rotor top. ~~The maximum TKE values are largest with Fitch-off, and they are slightly smaller with Fitch-on-1 and significantly smaller with Fitch-on-0.25.~~

Outside the farm area and even in the wake region, the ~~two EWP and Fitch-off~~ schemes provide similar wind speed and TKE values. ~~This can for example be seen in~~, see for example Fig. 12, which is for the ~~transect-blue as in transect-purple~~ (Fig. 3b~~f~~, with longitude approximately 7.2°E). ~~This resemblance is not given when turbine-induced TKE is advected downwind of the farm such as in Fitch-on-1 and Fitch-on-0.25. Compared to Fitch-off, in the far wake region, TKE from Fitch-on-1 and Fitch-on-0.25 are larger above 200 m, which is above the Godewind 1 turbine hub height, see the right column of Fig. 12.~~

These characteristics can also be seen in a bird view of the spatial distribution of ~~TKE~~ the wind speed (Fig. 13) and TKE (Fig. 14) at 250 m over the wind farm cluster with the Godewind 1 farm in the domain center, ~~shown~~. The patterns of spatial distribution of wind speed are consistent with the four plots in Fig. ~~14a and b, for the Fitch and 13~~, though EWP shows overall smaller wind speed reduction downwind of the farm and Fitch-on-1 corresponds to overall larger reduction, when being compared to the rest. For the TKE, when TKE-advection is turned off, farm-induced TKE is mostly above the wind farm (Fig. 14b, Fitch-off). When the advection is turned on, the high-TKE values are transported downwind of the farm in the mean wind direction, in Fig. 14c (Fitch-on-1) and d (Fitch-on-0.25), respectively. TKE in the EWP scheme, ~~respectively, for the same time as in Figs. 11 and 12,~~ as a function of the wind shear, follows the mean flow. When the TKE-advection is turned off, EWP-off provides similar spatial distribution to Fig. 14a, only with the maximum TKE slightly less-away from the Godewind 1 farm (not shown).

#### 4 ~~Discussion~~Discussions and conclusions

365 For the first time, the calculations of both wind speed and TKE from two explicit wind farm parametrization schemes (Fitch and EWP) in WRF are compared and verified through a case study, thanks to the open access high frequency flight data over and around the wind farm Godewind 1 (Bärfuss et al., 2019a) and FINO 1 measurements. This study thus complements S2020 where only the Fitch scheme was used to model the wind farm wake. Additionally, we used a WRF version, where the turbine-induced TKE is correctly integrated in and advected with the overall TKE field, following Archer et al. (2020).

370 The farm wake effect is ~~observed in~~discussed here with a variety of measurements: in the FINO 1 mast measurements shown as vertical wind-profile and time series, in the SAR 10-m wind speed shown as spatial distribution and in the flight data shown as cross-wind farm transect distribution of wind speed and TKE at 250 m. The WRF modeling with the two farm parametrization schemes EWP and Fitch captures these observed farm wake effect consistently in terms of wind speed, but with some noticeable differences. In the vertical wind-profiles at ~~FINO+FINO 1~~FINO 1, when compared to the EWP scheme, the wind speed deficit due to the wind farm wakes using the Fitch scheme is more centered and more pronounced around the hub height and rotor area, ~~shown visible~~as a kink in the profile. In the EWP scheme, due to the subgrid-scale vertical wake expansion, the wind deficit is more spread and smooth over the rotor area. The larger wind speed deficit in association with the Fitch scheme beneath the rotor top height is also visible over the wind farm and in the wake areas. The flight data suggests a flow acceleration on the southern side of the wind farm Godewind 1 accompanying the flow from the southwest. This acceleration is however  
375 not captured in WRF. It is expected that a high fidelity model is needed to ~~resolve~~investigate further this feature.

Even though the modeled wind speeds are comparable using the two schemes, the results on TKE are significantly different. The Fitch scheme, having TKE contributions from both the shear and an explicit term related to the turbine power and thrust coefficients, provides TKE values several times larger than those from the EWP scheme~~over the wind farm~~. In addition, WRF misses the flow acceleration south to the farm and it underestimates TKE in the adjacent wind farm area. At the northern part of  
385 the farm, the modeled TKE values using the Fitch scheme are of comparable magnitudes with respect to to the measurements. TKE values from the EWP scheme are significantly underestimated. This suggests that turbine-induced TKE does not only develop from the shear, as assumed in the EWP scheme, but instead an explicit source is required. ~~The difference in the TKE magnitude from the two schemes become quickly negligible away from the farm area, likely due to the fact that the TKE-advection is not activated in the simulation using the Fitch scheme (Section 2.2).~~

390 ~~This is not the case when the wind-farm-induced~~

Most recent studies in the literature recommended deactivating TKE-advection scheme is turned on, as shown in the spatial distribution of TKE over farm-cluster around the Godewind 1 with a farm-induced TKE factor  $C_{TKE}$  when using the Fitch scheme, based on simulations with WRF containing a code bug that incorrectly treated the turbine-induced TKE in the advection scheme and incorrect neglect of electro-mechanical losses as pointed out in (Archer et al., 2020). Archer et al. (2020)  
395 's analysis suggests that the two issues interact with each other, causing compensating errors. This generated TKE values in realistic range, which might be the reason that these issues haven't been identified before. S2020 found that, with the bug, their simulation is in better agreement with measurements with advection turned off.

All results presented here are from the bug-fixed version of WRF, following Archer et al. (2020). Accordingly, we tested two correction factors,  $\alpha = 0.25$  and 1. Archer et al. (2020)'s study recommended using  $\alpha$  less than 1 in Fig. 14e and d, respectively. Unlike in Fig. 14a, where farm-induced TKE is mostly, e.g. 0.25, according to their verification with Large Eddy Simulations. This is however not supported by the current study. Using  $\alpha = 0.25$  does not always improve the results, as can be seen in the comparison with measurements from FINO 1, or with the flight data over the Godewind 1 farm. With TKE-advection turned on in Fitch, TKE is no longer concentrated above the wind farm, it is advected in the mean wind direction in Fig. 14e and d. TKE in the EWP scheme, as a function of the wind shear, but advected with the mean flow, similar to EWP in which the shear-induced turbulence naturally follows the mean flow. The spatial gradient patterns of TKE are more similar between the two schemes, comparing 14b with e and d. In addition, model results with  $C_{TKE} = 0.25$  and 1 are also used to compare with the mean advection. With TKE-advection turned on and  $\alpha = 1$ , the results of mean wind speed field are quite similar to that with TKE-advection turned off. While using  $\alpha = 0.25$  gives similar spatial distribution of wind speed and TKE at 250 m from the flight track, in the same way as in Fig. ??, which are shown in Fig. 10. It, it gives quite different magnitudes of speed-reduction as well as TKE values. Due to lack of measurements, it remains inconclusive how much the inclusion of farm-induced-TKE advection improves the results and what are the correct  $C_{TKE} \alpha$  values to use; more measurements. More measurements and more meteorological conditions are needed for further investigation.

Since most studies in the literature using the Fitch scheme are affected by the code bug, here we also briefly examine some results from WRF before the bug-fix. Fig. 15 shows the profiles at point A, similar as Fig. 7, but now also includes a simulation with WRF-Fitch with the bug and advection turned on (the only option for  $\alpha$  is 1 in that version), the results are very different both for wind speed and TKE, compared to the bug-fixed version with  $\alpha = 1$ . This result suggests that the effect of this bug is not negligible.

The impact of deactivated TKE-advection was also tested in connection with the simulation with no farms (NWF-off) and the EWP scheme (EWP-off). Compared to NWF and EWP, the differences in the wind field are not systematic but shown to be random noises with NWF-off and EWP-off (not shown). One can notice that TKE related to turbine-affected shear travels slightly further in EWP than EWP-off. The overall effect on the wind speed and TKE is marginal and do not change the findings in the study.

The simulations here also suggest the presence of a global blockage effect when the flow approaches the wind farms. Though future studies are required to understand if such an effect is accurately captured, and which scheme describes such an effect better.

The studied case becomes even more interesting due to the presence of LLJs, in addition to the wind farm effect, as LLJ is as LLJs are a common phenomenon in this area of the North Sea. Numerical modeling studies of wind energy usually address the rich resource in connection with LLJs, though few have included a wind farm wake effect. This case study shows an overestimation of the 100-m wind speed by 1.59 approximately 1.45  $\text{m s}^{-1}$  at FINO 1 when ignoring the wind farm effect in the WRF modeling, accounting 13.11–22.20% of the mean wind speed during this simulation period. At the same time, measurements and modeling at FINO 1 suggest that the wind speed distribution with height profile in the presence of LLJ-LLJs is modified by the presence of wind farm wakes, showing. The wind farm wakes lead to a reduced wind speed up to the jet

nose, a higher jet nose and a higher wind shear beneath the jet nose. This upward shift of the jet nose in the presence of a wind farm was also modelled in different LES studies (Sharma et al., 2017; Abkar et al., 2016).

## 435 5 Conclusions

It is important to take the wind farm wake effect into account when calculating LLJ wind speeds in areas with wind farms. LLJ structures are affected by the presence of wind farms. The WRF model with both the Fitch and the EWP schemes can capture the wind speed field rather well and consistently. ~~The schemes can not capture the flow acceleration along the farm edge~~It remains inconclusive which scheme is better at describing the wind field. It also remains inconclusive which correction  
440 factor should be used in connection with the turbine-induced TKE generation in the Fitch scheme. TKE from the EWP scheme is significantly underestimated compared to the flight measurements. This suggests that an explicit turbine-induced source of TKE should be included in addition to the shear-generated TKE. Neither scheme can not capture the flow acceleration along the farm edge.

This case study shows typical features of the wind farm wakes in the presence of LLJs~~through a few key parameters~~, using  
445 the most-used modeling approaches. It raises issues that have not been addressed in the literature, namely the interaction of wind farm wakes and LLJs. It also clearly shows the need ~~in the improvement of~~for improvements of turbine-induced TKE calculations using the wind farm parameterizations in WRF. This study therefore serves as a start for a more systematic study of similar conditions.

450 *Code and data availability.* The WRF model code is publicly available at <https://github.com/wrf-model/WRF>. The WRF input files and the source code for the wind farm parameterizations of Volker et al. (2015) as well as of Fitch et al. (2012) with bugfix by Archer et al. (2020) are permanently indexed at <https://zenodo.org/record/4133350#.X5aZOO3cBaR> (DOI 10.5281/zenodo.4133350) ~~This link will be updated.~~ Updates for EWP will be made available on <https://gitlab.windenergy.dtu.dk/WRF/EWP>. The SAR data are available from <https://satwinds.windenergy.dtu.dk/>. The FINO 1 measurements can be assessed from <http://fino.bsh.de/>. The flight data are available on <https://doi.org/10.1594/PANGAEA.902845>. The OSTIA data is available from <http://my.cmems-du.eu/motu-web/Motu>. ERA5 data was downloaded from <https://doi.org/10.24381/cds.bd0915c6>. Data and scripts required to reproduce the analysis in this study are also shared in the above  
455 Zenodo-record at <https://zenodo.org/record/4322866#.X9iw2bNCfmE> with DOI 10.5281/zenodo.4322866. ~~This link will be updated.~~

*Author contributions.* XL outlined the manuscript. XL and JF ran the simulations, performed the data analysis and wrote the draft.

*Competing interests.* The authors declare that they have no conflict of interest.



460 *Acknowledgements.* This study is supported by the Forskel/EUDP OffshoreWake project (PSO-12521/EUDP 64017-0017). We thank the  
open source platform <https://doi.pangaea.de/10.1594/PANGAEA.902845> for the flight data and ~~FINO~~. We thank the Federal Maritime and  
Hydrographic Agency (BSH) for providing measurements at the FINO 1 station. ~~The satellite data in Fig. 1a is from.~~ We thank our colleagues  
Jake Badger, Andrea Hahmann and Rogier Floors for discussions. ~~ERA5 data are downloaded from ECWMF and Copernicus Climate~~  
~~Change Service Climate Data Store.~~ Data processing and visualization for this study was in part ~~made~~ conducted using the python  
465 programming language and involved use of the following software packages: NumPy (van der Walt et al., 2011), pandas (McKinney, 2010),  
xarray (Hoyer and Hamman, 2017), Matplotlib (Hunter, 2007). The colours for the line plot have been selected through the 'Color Cycle  
Picker' <https://github.com/mpetroff/color-cycle-picker>. The authors are grateful for the tools provided by the open-source community.

## References

- 4Coffshore: Global Offshore Wind Farms, [www.4coffshore.com](http://www.4coffshore.com).
- 470 Abkar, M., Sharifi, A., and Porté-Agel, F.: Wake flow in a wind farm during a diurnal cycle, *Journal of Turbulence*, 17, 420–441, <https://doi.org/10.1080/14685248.2015.1127379>, 2016.
- Archer, C. L., Wu, S., and Ma, Y.: Two corrections for turbulent kinetic energy generated by wind farms in the WRF model, *Monthly Weather Review*, DOI 10.1175/MWR-D-20-0097.1, 2020.
- Badger, J., Imberger, M., Volker, P., A. Kleidon, S. G., and Minz, J.: Making the most of offshore wind - re-evaluating the potential of  
475 offshore wind in the German North Sea, <https://www.agora-energiewende.de/en/publications/making-the-most-of-offshore-wind/>, 2020.
- Bärfuss, K., Hankers, R., Bitter, M., Feuerle, T., Schulz, H., Rausch, T., Platis, A., Bange, J., and Lampert, A.: In-situ airborne measurements of atmospheric and sea surface parameters related to offshore wind parks in the German Bight, <https://doi.org/10.1594/PANGAEA.902845>, 2019a.
- Bärfuss, K., Hankers, R., Bitter, M., Feuerle, T., Schulz, H., Rausch, T., Platis, A., Bange, J., and Lampert, A.: In-situ airborne measurements  
480 of atmospheric and sea surface parameters related to offshore wind parks in the German Bight, Flight 20171014\_flight39, PANGAEA, <https://doi.org/10.1594/PANGAEA.903088>, 2019b.
- Bundesnetzagentur: Turbines positions, [https://www.bundesnetzagentur.de/SharedDocs/Downloads/DE/Sachgebiete/Energie/Unternehmen\\_Institutionen/ErneuerbareEnergien/ZahlenDatenInformationen/VVOeFF\\_Registerdaten/2019\\_01\\_Veroeff\\_RegDaten.html](https://www.bundesnetzagentur.de/SharedDocs/Downloads/DE/Sachgebiete/Energie/Unternehmen_Institutionen/ErneuerbareEnergien/ZahlenDatenInformationen/VVOeFF_Registerdaten/2019_01_Veroeff_RegDaten.html), last access: 19.03.2021, 2019.
- 485 Catton, M.: Climatological study of wakes from offshore wind farm clusters, Tech. Rep. DTU Wind Energy-M-0361, Wind Energy Department, DTU, Roskilde, Denmark, <http://production.datastore.cvt.dk/oastore?oid=5f23fcaed9001d016b4e226d&targetid=5f23fcaed9001d016b4e2270>, last access: 19.03.2021, 2020.
- Djath, B., Schulz-Stellenfleth, J., and Canadillas, B.: Impact of atmospheric stability on X-band and C-band synthetic aperture radar imagery of offshore windpark wakes, *Journal of Renewable and Sustainable Energy*, 10, 043 301, <https://doi.org/10.1063/1.5020437>, 2018.
- 490 Díaz, H. and Guedes Soares, C.: Review of the current status, technology and future trends of offshore wind farms, *Ocean Engineering*, 209, 107 381, <https://doi.org/https://doi.org/10.1016/j.oceaneng.2020.107381>, 2020.
- Dörenkämper, M., Optis, M., Monahan, A., and Steinfeld, G.: On the Offshore Advection of Boundary-Layer Structures and the Influence on Offshore Wind Conditions, *Boundary-Layer Meteorol.*, 155, <https://doi.org/10.1007/s10546-015-0008-x>, 2015.
- Emodnet: Wind Farms (Polygons), [https://www.emodnet-humanactivities.eu/search-results.php?dataname=Wind+Farms+\(Polygons\)](https://www.emodnet-humanactivities.eu/search-results.php?dataname=Wind+Farms+(Polygons)), last  
495 access: 19.03.2021, 2020.
- Energistyrelsen: Turbines positions, <https://ens.dk/service/statistik-data-noegletal-og-kort/data-oversigt-over-energisektoren>, last access: 19.03.2021, 2020.
- ERA5: ERA5 hourly data on pressure levels from 1979 to present, <https://doi.org/10.24381/cds.bd0915c6>, last access: 19.03.2021.
- Fischereit, J., Brown, R., Larsén, X. G., Badger, J., and Hawkes, G.: Review of mesoscale wind farm parameterisations and their applications,  
500 *Boundary-Layer Meteorol.*, in revision, 2021.
- Fitch, A. C., Olson, J. B., Lundquist, J. K., Dudhia, J., Gupta, A. K., Michalakes, J., and Barstad, I.: Local and Mesoscale Impacts of Wind Farms as Parameterized in a Mesoscale NWP Model, *Monthly Weather Review*, 140, 3017–3038, <https://doi.org/10.1175/MWR-D-11-00352.1>, 2012.

- Hersbach, H., Stoffelen, A., and de Haan, S.: An improved C-band scatterometer ocean geographical model function: CMOD5, *J. Geophys. Res.*, 112, <https://doi.org/10.1029/2006JC003743>, 2007.
- 505 Hoyer, S. and Hamman, J.: xarray: N-D labeled Arrays and Datasets in Python, *Journal of Open Research Software*, 5, 10, <https://doi.org/10.5334/jors.148>, 2017.
- Hunter, J. D.: Matplotlib: A 2D Graphics Environment, *Computing in Science Engineering*, 9, 90–95, <https://doi.org/10.1109/MCSE.2007.55>, 2007.
- 510 Iacono, M. J., Delamere, J. S., Mlawer, E. J., Shephard, M. W., Clough, S. A., and Collins, W. D.: Radiative forcing by long-lived greenhouse gases: Calculations with the AER radiative transfer models, *Journal of Geophysical Research*, 113, 13 013, 2008.
- Kain, J. S. and Fritsch, J. M.: Convective parameterization for mesoscale models: The Kain-Fritsch scheme. The representation of cumulus convection in numerical models, *Meteor. Monogr., Ameri. Meteor. Soc.*, 24, 165–170, 1993.
- Kalverla, P., Steeneveld, G.-J., Ronda, R., and Holtslag, A. A. M.: Evaluation of three mainstream numerical weather prediction models with observations from meteorological mast IJmuiden at the North Sea, *Wind Energy*, 22, 34–48, <https://doi.org/10.1002/we.2267>, 2019.
- 515 Lampert, A., Bärfuss, K., Platis, A., Siedersleben, S., Djath, B., Cañadillas, B., Hankers, R., Bitter, M., Feuerle, T., Schulz, H., Rausch, T., Angermann, M., Schwithal, A., Bange, J., Schulz-Stellenfleth, J., Neumann, T., and Emeis, S.: In-situ airborne measurements of atmospheric and sea surface parameters related to offshore wind parks in the German Bight, <https://doi.org/10.1594/PANGAEA.902845>.
- Lampert, A., Bärfuss, K., Platis, A., Siedersleben, S., Djath, B., Cañadillas, B., Hunger, R., Hankers, R., Bitter, M., Feuerle, T., Schulz, H., Rausch, T., Angermann, M., Schwithal, A., Bange, J., Schulz-Stellenfleth, J., Neumann, T., and Emeis, S.: In situ airborne measurements of atmospheric and sea surface parameters related to offshore wind parks in the German Bight, *Earth System Science Data*, 12, 935–946, <https://doi.org/10.5194/essd-12-935-2020>, <https://essd.copernicus.org/articles/12/935/2020/>, 2020.
- 520 Langor, E. N.: Characteristics of Offshore Wind Farm Wakes and their Impact on Wind Power Production from Long-term Modelling and Measurements, Tech. Rep. DTU Wind Energy-M-0315, 2019.
- 525 Lee, J. C. and Lundquist, J. K.: Evaluation of the wind farm parameterization in the Weather Research and Forecasting model (version 3.8.1) with meteorological and turbine power data, *Geoscientific Model Development*, 10, <https://doi.org/10.5194/gmd-10-4229-2017>, 2017a.
- Lee, J. C. and Lundquist, J. K.: Observing and Simulating Wind-Turbine Wakes During the Evening Transition, *Boundary-Layer Meteorology*, 164, 449–474, <https://doi.org/10.1007/s10546-017-0257-y>, 2017b.
- McKinney, W.: Data Structures for Statistical Computing in Python, in: *Proceedings of the 9th Python in Science Conference*, edited by van der Walt, S. and Millman, J., <https://conference.scipy.org/proceedings/scipy2010/pdfs/mckinney.pdf>, last access: 27 October 2020, 2010.
- 530 Nakanishi, M. and Niino, H.: Development of an improved turbulence closure model for the atmospheric boundary layer, *J. Meteorol. Soc. Jpn.*, 87, 895–912, 2009.
- Nunalee, C. G. and Basu, S.: Mesoscale modeling of coastal low-level jets: implications for offshore wind resource estimation, *Wind Energy*, 17, 1199–1216, 2014.
- 535 Platis, A., Siedersleben, S. K., Bange, J., Lampert, A., Bärfuss, K., Hankers, R., Cañadillas, B., Foreman, R., Schulz-Stellenfleth, J., Djath, B., Neumann, T., and Emeis, S.: First in situ evidence of wakes in the far field behind offshore wind farms, *Scientific Reports*, 8, <https://doi.org/10.1038/s41598-018-20389-y>, 2018.
- Pryor, S. C., Shepherd, T. J., Volker, P. J. H., Hahmann, A. N., and Barthelmie, R. J.: "Wind Theft" from Onshore Wind Turbine Arrays: Sensitivity to Wind Farm Parameterization and Resolution, *Journal of Applied Meteorology and Climatology*, 59, 153–174, <https://doi.org/10.1175/jamc-d-19-0235.1>, 2020.
- 540

- Sharma, V., Parlange, M. B., and Calaf, M.: Perturbations to the Spatial and Temporal Characteristics of the Diurnally-Varying Atmospheric Boundary Layer Due to an Extensive Wind Farm, *Boundary-layer Meteorology*, 162, 255–282, <https://doi.org/10.1007/s10546-016-0195-0>, 2017.
- 545 Shepherd, T., Barthelmie, R. J., and Pryor, S. C.: Sensitivity of Wind Turbine Array Downstream Effects to the Parameterization Used in WRF, *Journal of Applied Meteorology and Climatology*, 59, 333–361, <https://doi.org/10.1175/JAMC-D-19-0135.1>, 2020.
- Siedersleben, S. K., Platis, A., Lundquist, J. K., Djath, B., Lampert, A., Bärfuss, K., Canadillas, B., Schulz-Stellenfleth, J., Bange, J., Neumann, T., and Emeis, S.: Observed and simulated turbulent kinetic energy (WRF 3.8.1) over large offshore wind farms, *Geoscientific Model Development*, 13, 249–268, <https://doi.org/http://doi.org/10.5194/gmd-2019-100>, 2020.
- 550 Skamarock, W., Klemp, J., Dudhia, J., Gill, D., Barker, D., Wang, W., and Powers, J.: A Description of Advanced Research WRF, Tech. Rep. NCAR/TN-468+STR, NCAR, NCAR, Boulder, Colorado, USA, 2007.
- Smedman, A.-S., Tjernström, M., and Högström, U.: Analysis of the turbulence structure of a marine low-level jet, *Boundary-Layer Meteorol*, 66, 105–126, 1993.
- Smedman, A.-S., Bergström, H., and Högström, U.: Spectra, variance and length scales in a marine stable boundary layer dominated by a  
555 low level jet, *Boundary-Layer Meteorol*, 76, 211–232, 1995.
- Stark, J. D., Donlon, C. J., Martin, M. J., and McCulloch, M. E.: OSTIA : An operational, high resolution, real time, global sea surface temperature analysis system, in: *Oceans '07 IEEE Aberdeen*, conference proceedings. Marine challenges: coastline to deep sea, Aberdeen, Scotland, 2007.
- Tay, K., Koh, T., and Skote, M.: Characterizing mesoscale variability in low-level jet simulations for CBLAST-LOW 2001 campaign, *Meteorology and Atmospheric Physics*, <https://doi.org/https://doi.org/10.1007/s00703-020-00736-3>, 2020.
- 560 Tennekes, H. and Lumley, J. L.: A first course in turbulence, The MIT Press, 1972.
- Thompson, G., Rasmussen, R. M., and Manning, K.: Explicit forecasts of winter precipitation using an improved bulk microphysics scheme. Part-I: Description and sensitivity analysis, *Mon. Weather Rev.*, 132, 519–542, 2004.
- Tomaszewski, J. M. and Lundquist, J. K.: Simulated wind farm wake sensitivity to configuration choices in the Weather Research and  
565 Forecasting model version 3.8.1, *Geoscientific Model Development*, 13, 2645–2662, <https://doi.org/10.5194/gmd-13-2645-2020>, 2020.
- Valenzuela, G.: Theories for the interaction of electromagnetic and ocean waves - A review, *Boundary-Layer Meteorol*, 13, 61–85, 1978.
- van der Walt, S., Colbert, S. C., and Varoquaux, G.: The NumPy Array: A Structure for Efficient Numerical Computation, *Computing in Science Engineering*, 13, 22–30, <https://doi.org/10.1109/MCSE.2011.37>, 2011.
- Volker, P. J., Hahmann, A. N., Badger, J., and Jørgensen, H. E.: Prospects for generating electricity by large onshore and offshore wind farms,  
570 *Environmental Research Letters*, 12, <https://doi.org/10.1088/1748-9326/aa5d86>, 2017.
- Volker, P. J. H., Badger, J., Hahmann, A. N., and Ott, S.: The Explicit Wake Parametrisation V1.0: a wind farm parametrisation in the mesoscale model WRF, *Geoscientific Model Development*, 8, 3715–3731, <https://doi.org/10.5194/gmd-8-3715-2015>, 2015.
- Wagner, D., Steinfeld, G., Witha, B., Wurps, H., and Reuder, J.: Low Level Jets over the Southern North Sea, *Meteorol. Z.*, 28, 389–415, 2019.

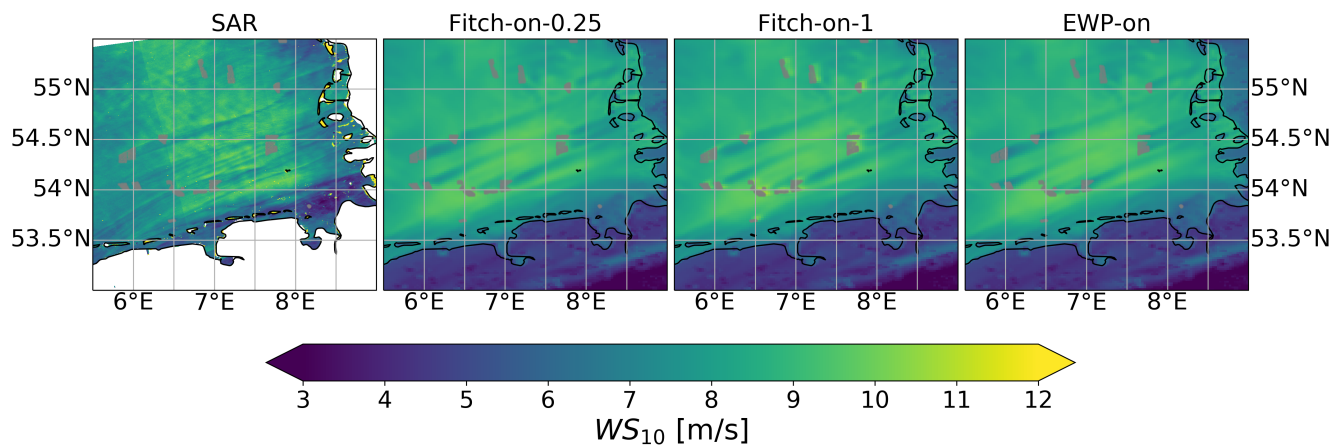

**Figure 1.** Wind speed ( $\text{ms}^{-1}$ ) at about 10 m height (a) From SAR at 17:17 UTC on 14 Oct 2017 ; and (b-d) from WRF with the Fitch scheme at 17:10 ; (c) from WRF with the EWP scheme at 17:10 on 14 Oct for different scenarios as in Table 3. The satellite data in (a) are taken from <https://satwinds.windenergy.dtu.dk/>.

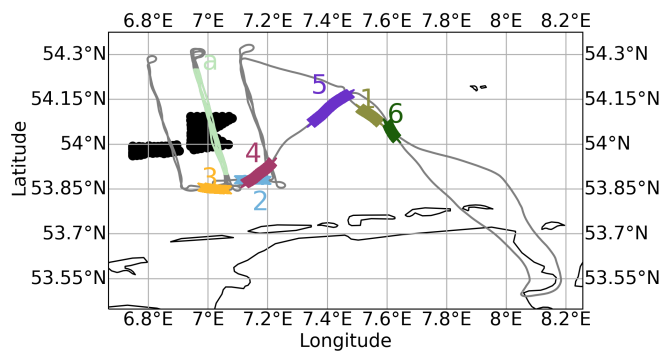

**Figure 2.** Flight tracks on 14 Oct 2017. Track labeled with “a” provides transect-flight data over the wind farm at about 250 m. Tracks labeled with numbers 1 to 6 provide the profile-flight data (see also Table 1). The flight track has been extracted from Bärffuss et al. (2019b).

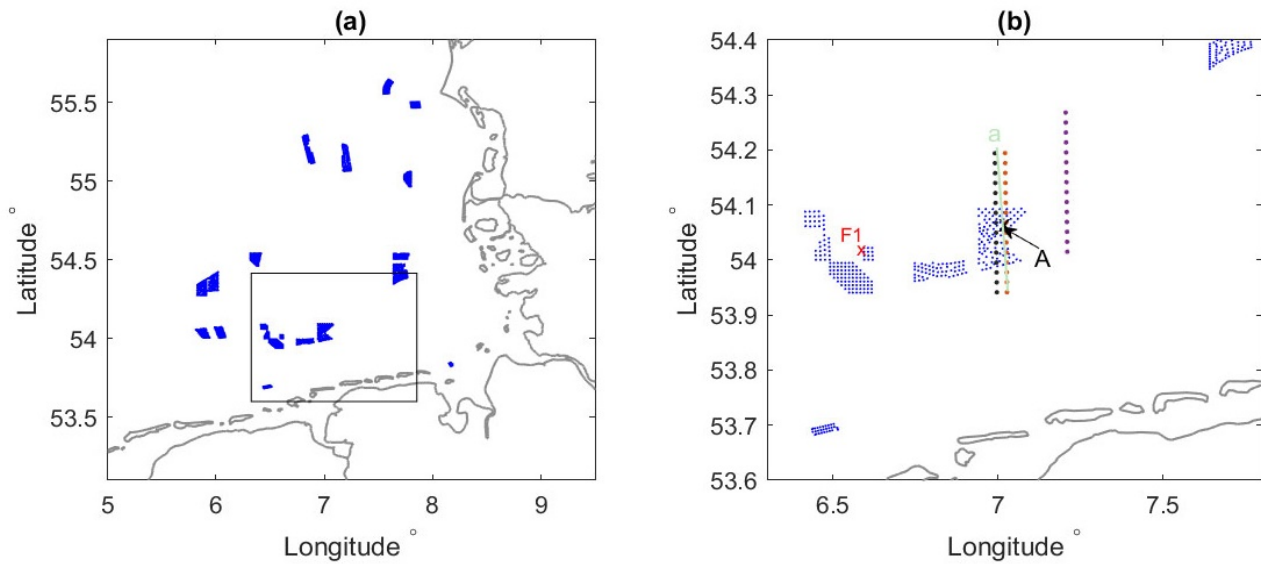

**Figure 3.** (a). Wind farm clusters that are included in the WRF modeling. The box includes the wind farms shown in (b) -Close-up-which is a close-up of (a), where the two consecutive rows over the Godewind 1 farm are WRF grid points (black and red), the flight legs are in between the two row of WRF grid points (transect labeled “a” in cyan-green as in Fig. 2 ) and one more row down wind (bluepurple). Also marked are the location of the FINO\_1 mast (F1) and point A on transect-a.



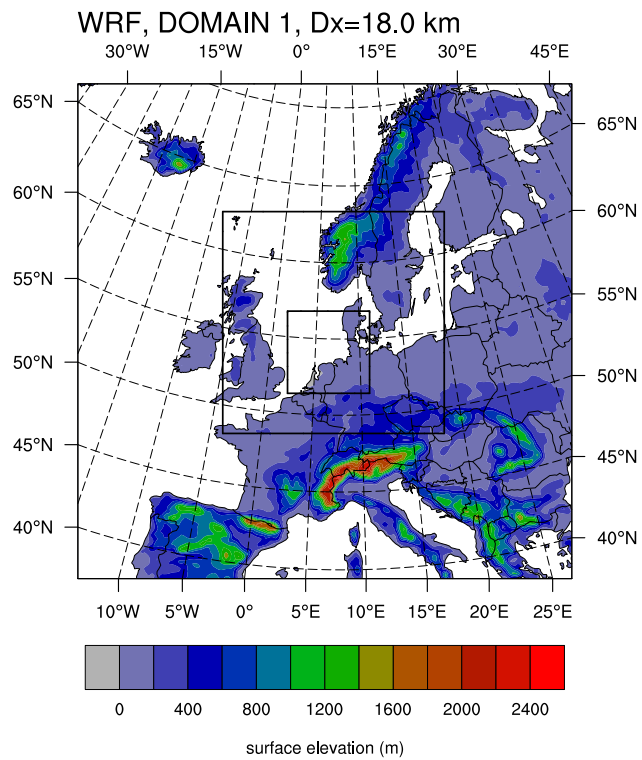

**Figure 4.** The three nested model domains in the WRF modeling, shown in colors show topography.

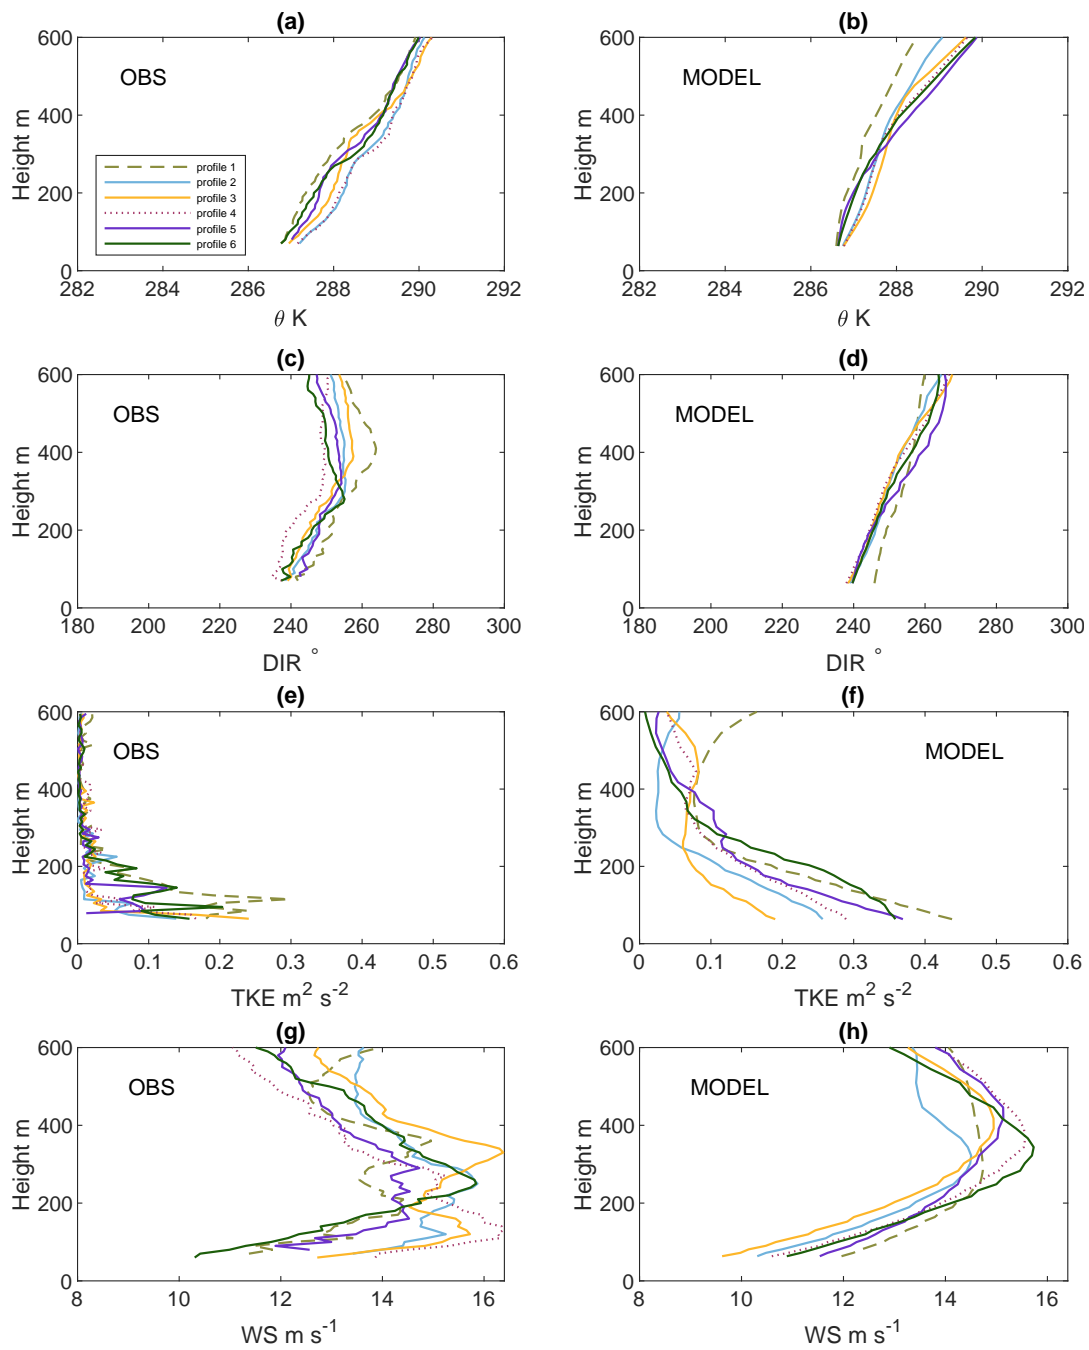

**Figure 5.** Vertical profiles of potential temperature (a, b), wind direction (c, d), TKE (e, f) and wind speed (g, h), observed (OBS) and modeled (MODEL) at the center positions of profile-flight 1 to 6. Note that the modeled data are from EWP scheme.

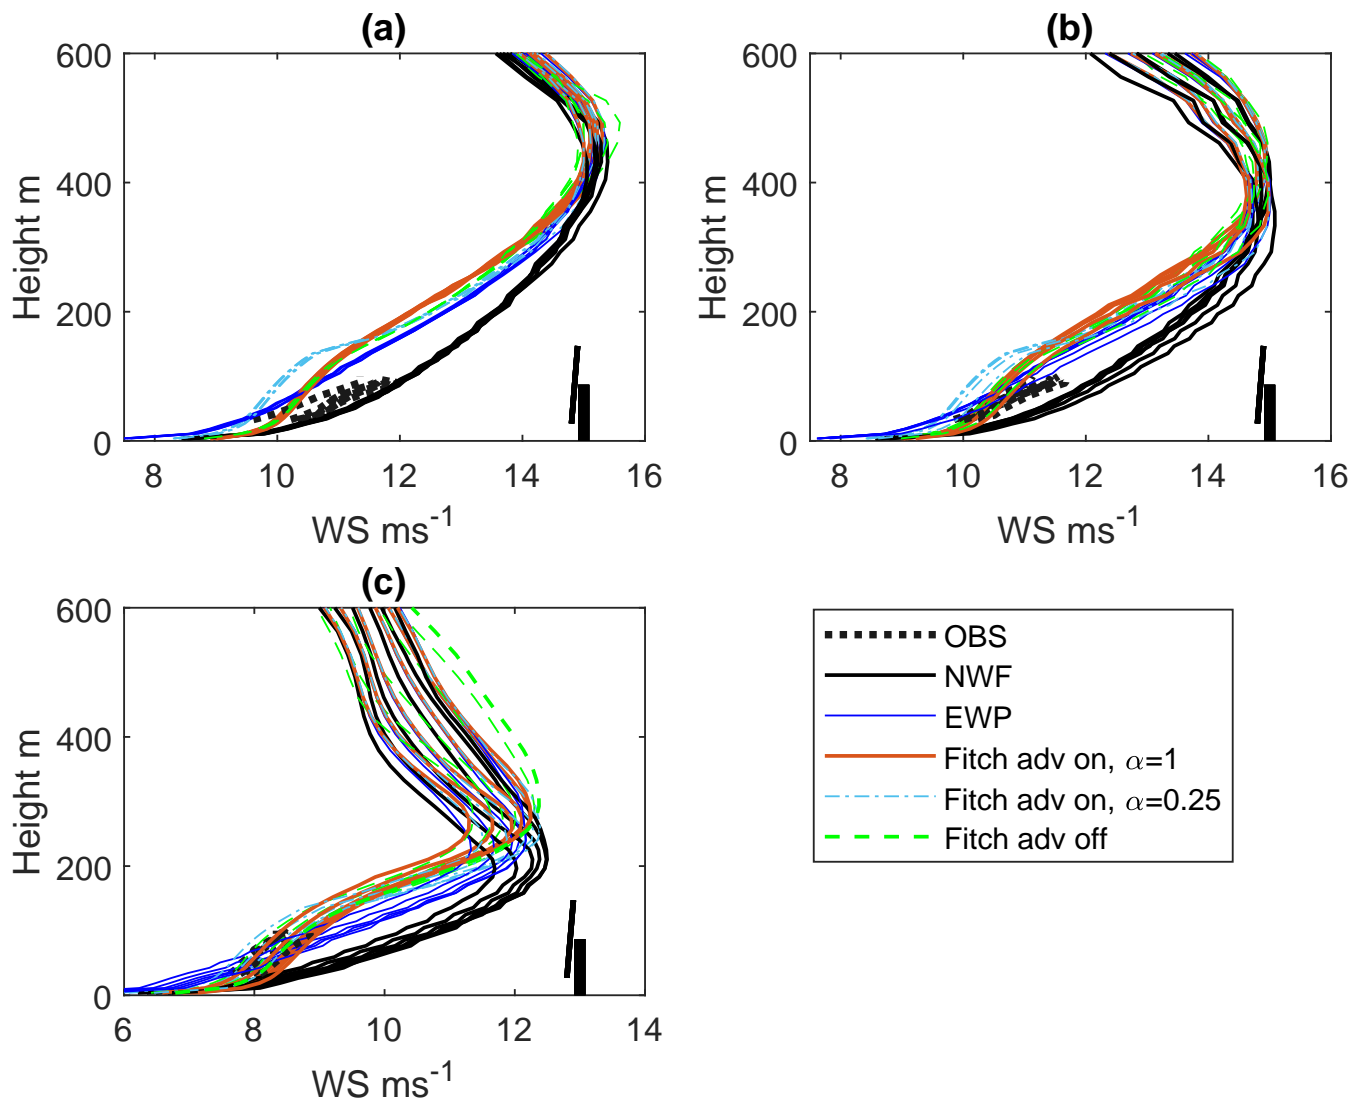

**Figure 6.** Wind profiles measured (OBS) and modeled ([FitchNWF](#), [EWP](#) and [NWF](#), [Fitch-on-1](#), [Fitch-on-0.25](#), [Fitch-off](#)) at FINO 1 station on 14 Oct. (a) [six](#)-10-min profiles between 14:00 and 15:00; (b) [six](#)-10-min profiles from 15:00-16:00; (c) [six](#)-10-min profiles from 20:00-21:00. [The corresponding turbine hub height and the rotor area from the upwind farm Borkum Riffgrund 1 are illustrated in black](#)

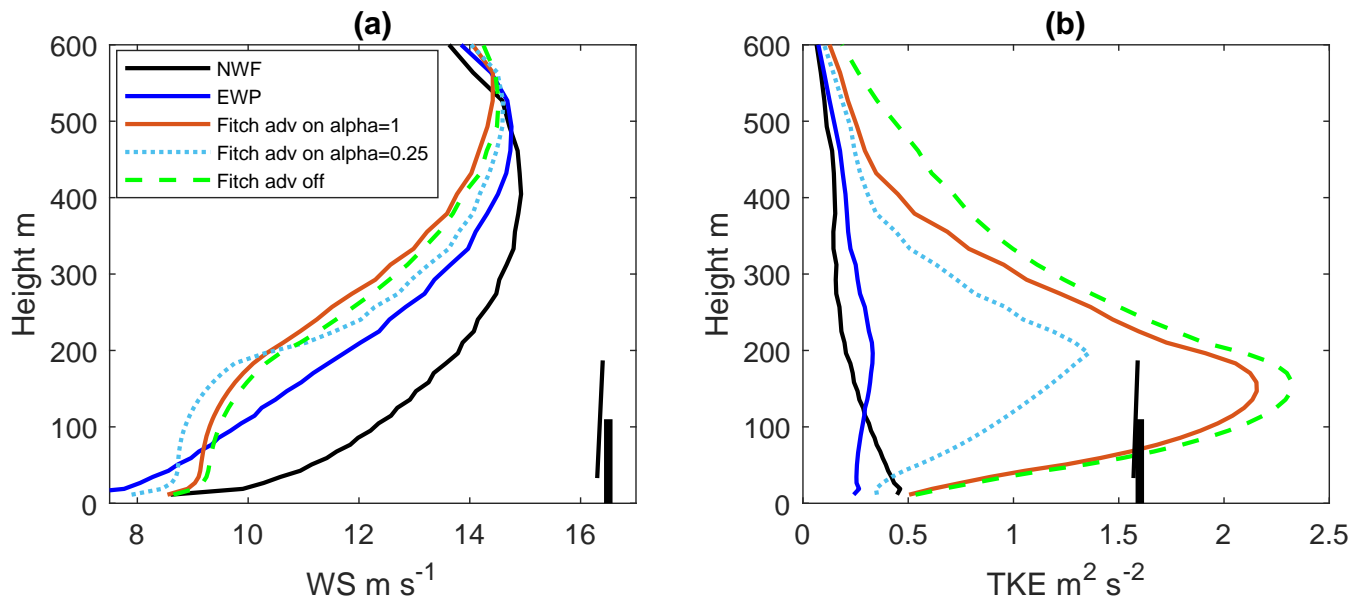

**Figure 7.** Modeled vertical profiles at Point A (see Fig. 3) over the Godewind 1 wind farm at 15:00 on 14 Oct, together with the transect-flight-4 data at 250 m (15:01 - 15:11) (a) wind speed; (b) TKE. The corresponding turbine hub height and the rotor area are illustrated in [grayblack](#).

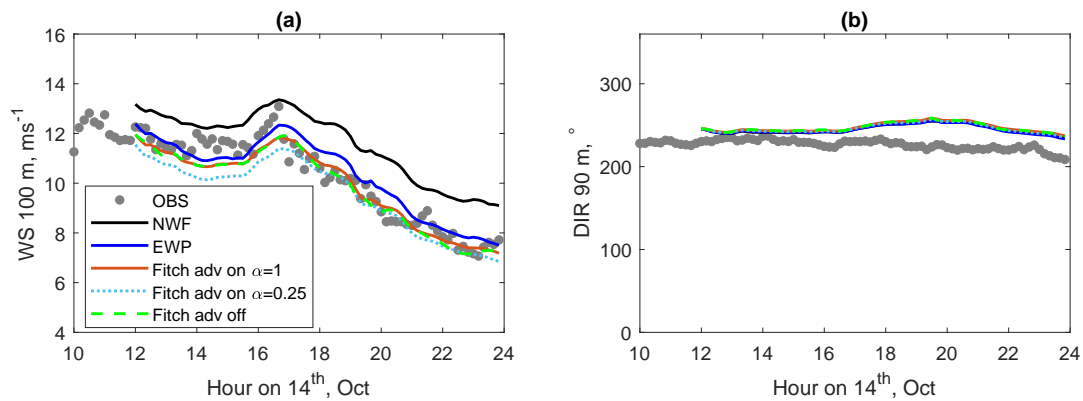

**Figure 8.** Measured and modeled time series at FINO 1 on the 14 Oct 2017: (a) wind speed at 100 m; (b) wind direction at 90 m, using Fitch and EWP schemes, as well as no farms option (NWF).

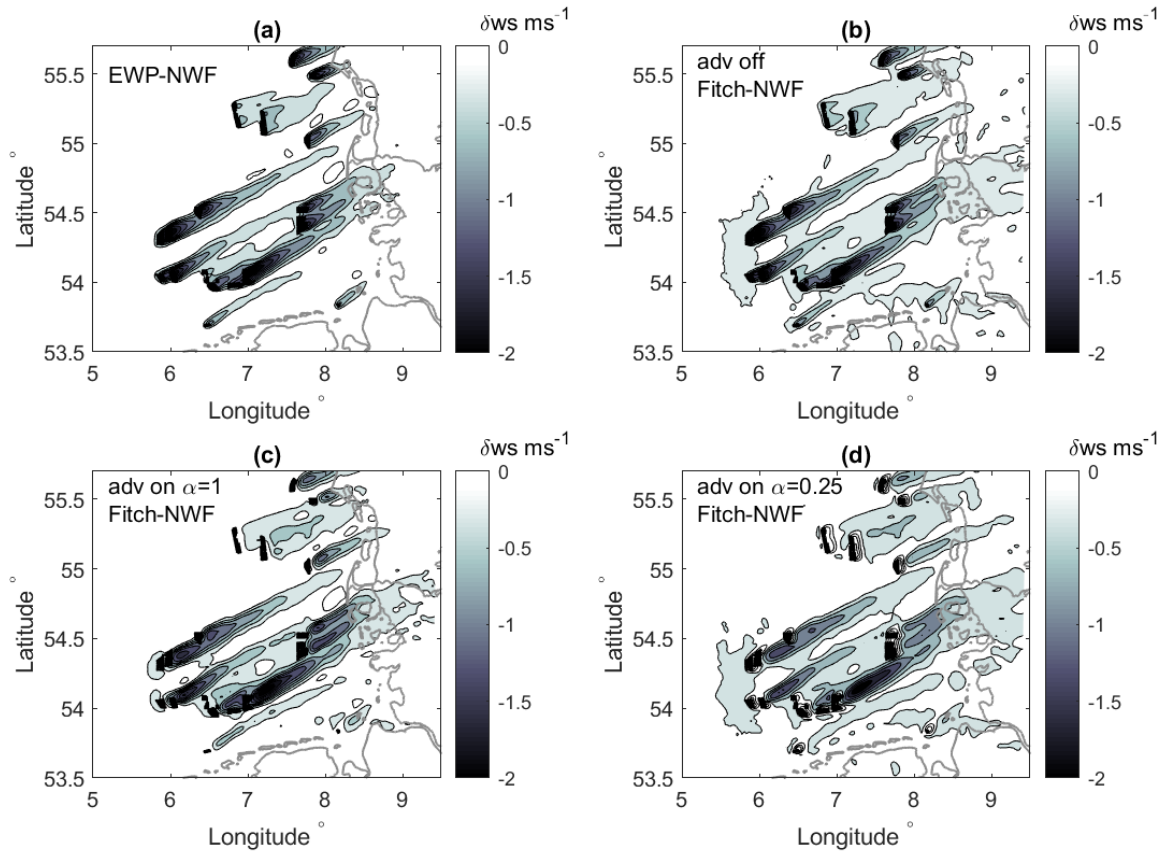

**Figure 9.** Wind speed deficit ( $\text{m s}^{-1}$ ) at about 10 m 17:00 on 14 Oct 2017, corresponding to the SAR image as in Fig. 1. (a) wind speed from the Fitch scheme minus those from the no-farm scheme deficit between EWP and NWF; (Fitch-NWF) deficit between Fitch-off and NWF; (bc) wind speed from the EWP scheme minus those from the no-farm scheme deficit between Fitch-on-1 and NWF; (EWP-NWF) deficit between Fitch-on-0.25 and NWF.

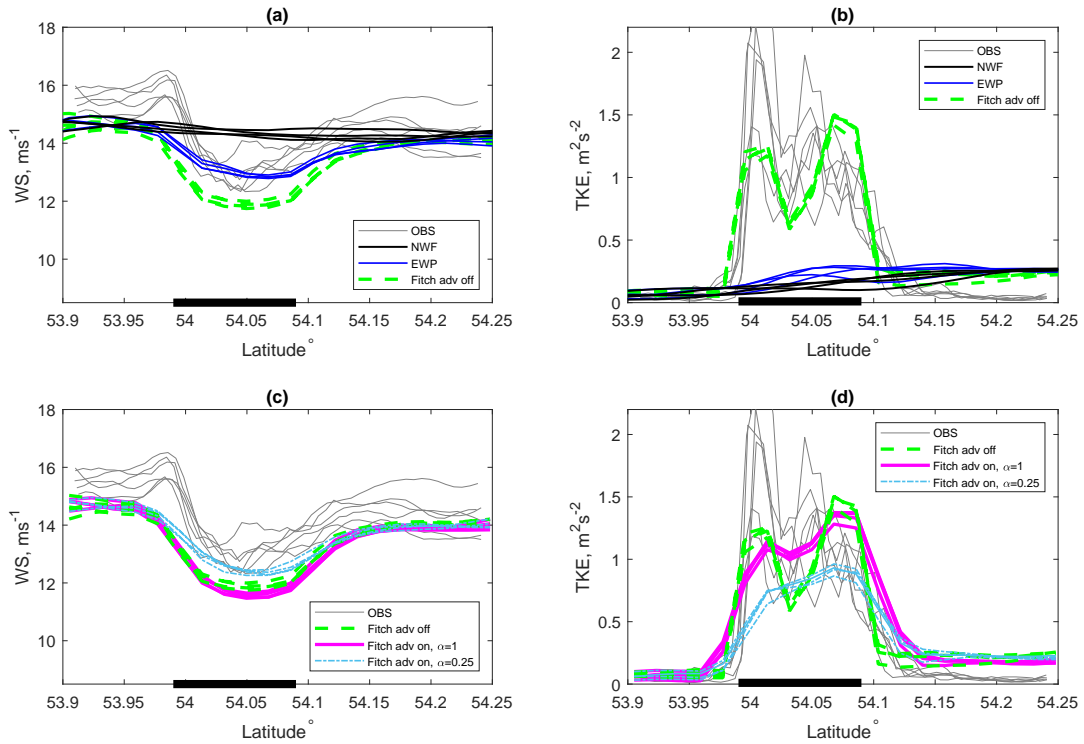

**Figure 10.** (a, c) [Transect-Transect-a](#) distribution of wind speed at 250 m as a function of latitude between 14:00 to 16:00 on 14 Oct 2017, observed (OBS) and modeled (every 30-min). (b, d) Similar to (a, c) but for TKE. The observed values are the flight data averaged over a distance of 2 km. The modeled values are from the use of the Fitch, the EWP and no wind farm (NWF) schemes. The wind farm is indicated on the  $x$ -axis with a thick black line.



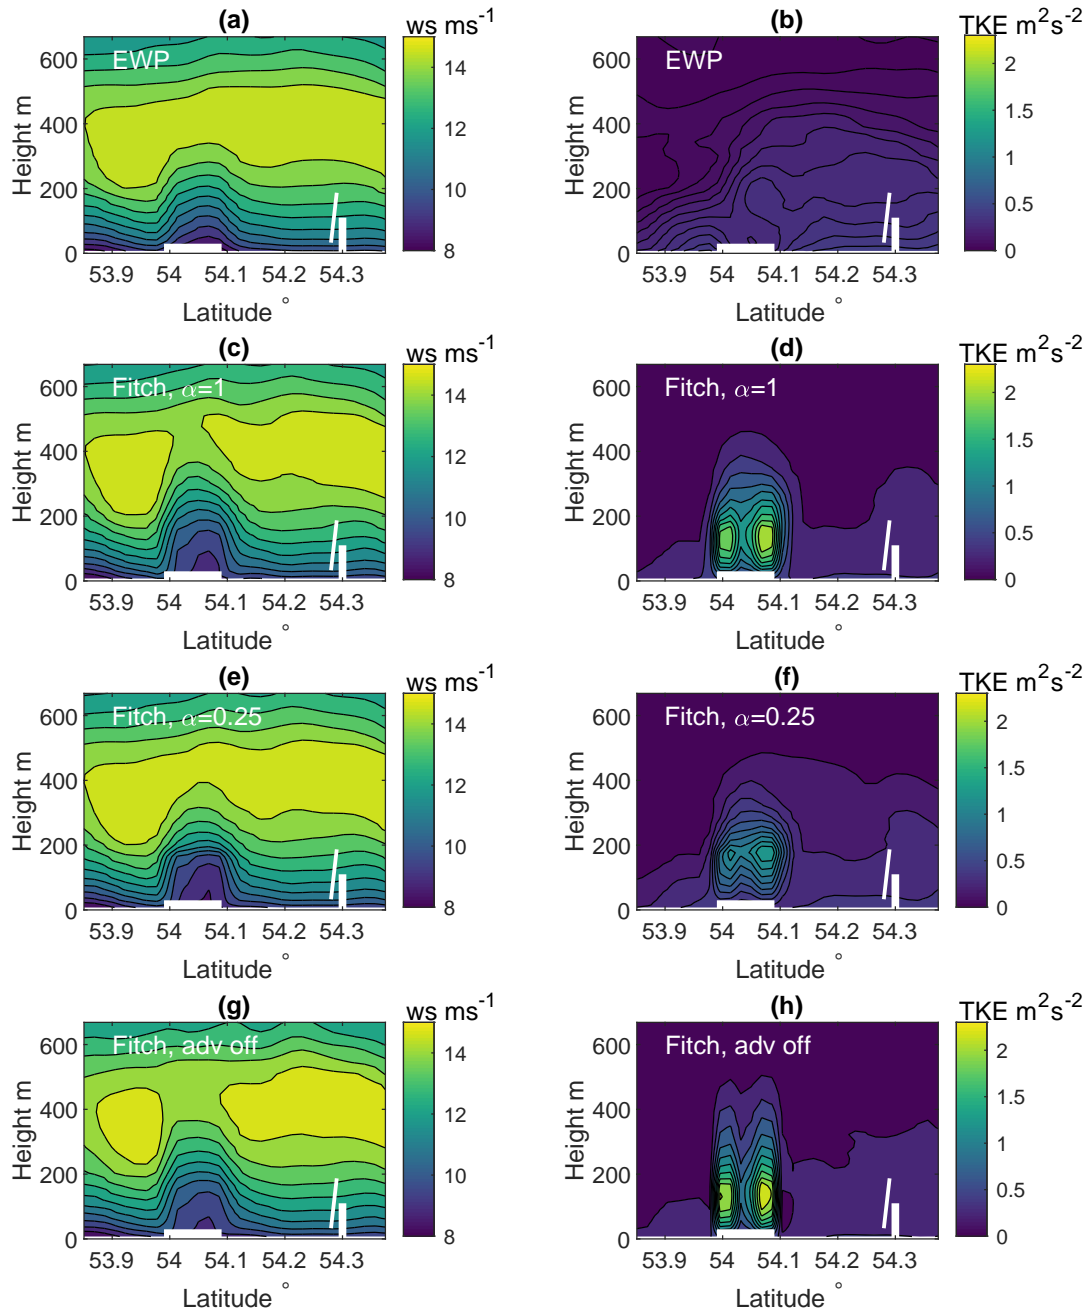

**Figure 11.** Distribution of wind speed (left column) and TKE (right column) over the transect-red (at longitude  $7.02^\circ\text{E}$ ) at 15:30 on 14 Oct 2017,  $x$ -axis: south-north and  $z$ -axis: height. Row-1: EWP. Row-2: Fitch-on-1. Row-3: Fitch-on-0.25. Row-4: Fitch-off. The wind farm is indicated on the  $x$ -axis with a thick white line and the corresponding turbine is illustrated in white.

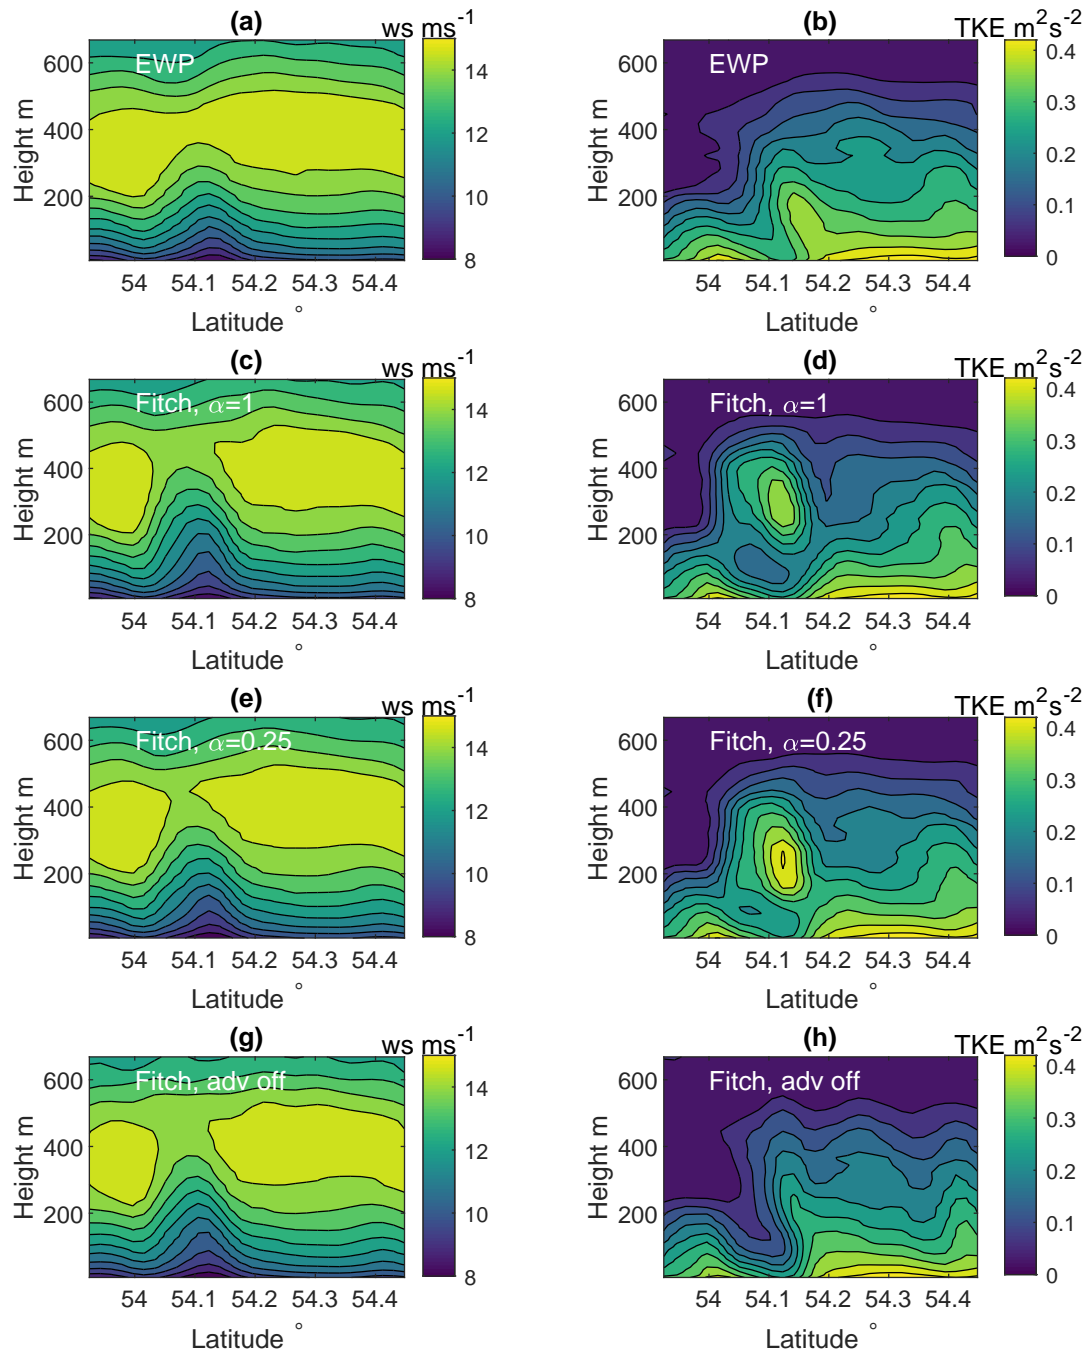

**Figure 12.** Distribution of wind speed and TKE over the transect blue—Similar to Fig. 11, but for transect-purple (at longitude 7.2°E) downwind of wind farms at 15:30 on 14 Oct.

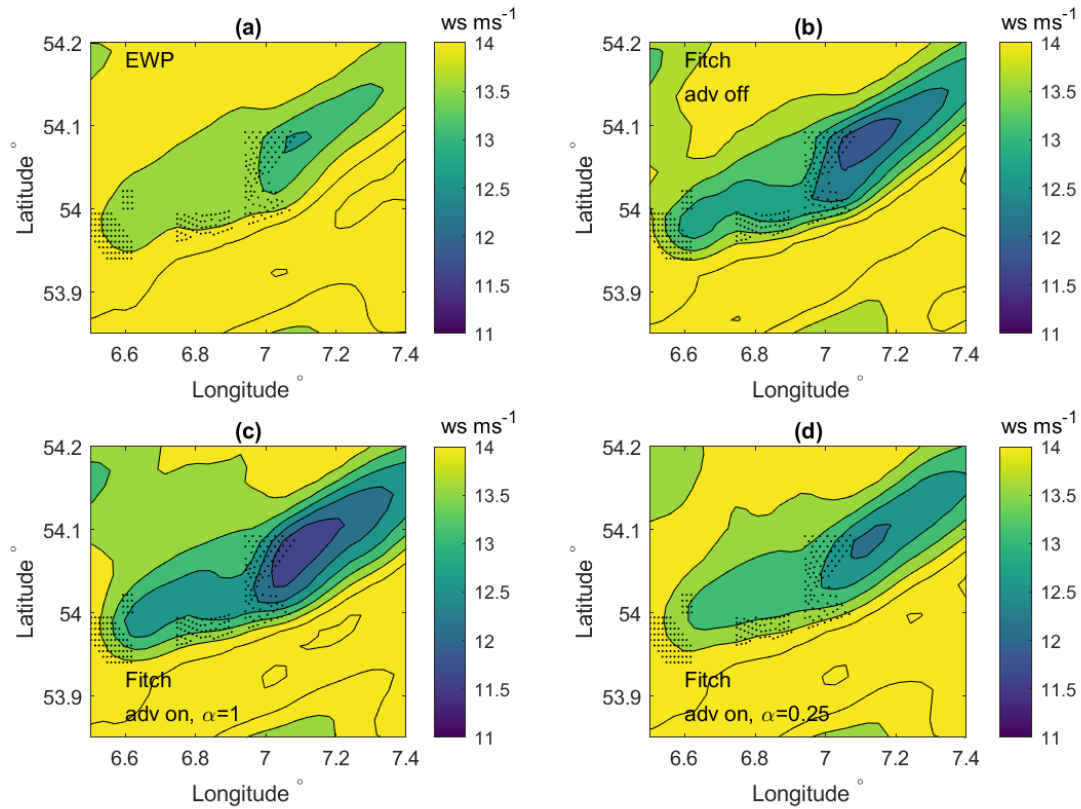

**Figure 13.** Spatial distribution of **TKE** wind speed at 250 m from WRF model at 20171014 15:30 (a) using **Fitch**-**EWP** scheme, **advection off** and  $C_{TKE}=1$ ; (b) using **EWP**-**Fitch** scheme, **advection of (Fitch-off)**; (c) using **Fitch** scheme, with advection on and  $C_{TKE}=0.25$   $\alpha = 1$  (**Fitch-on-1**); (d) using **Fitch** scheme, with advection on and  $C_{TKE}=1$   $\alpha = 0.25$  (**Fitch-on-0.25**)

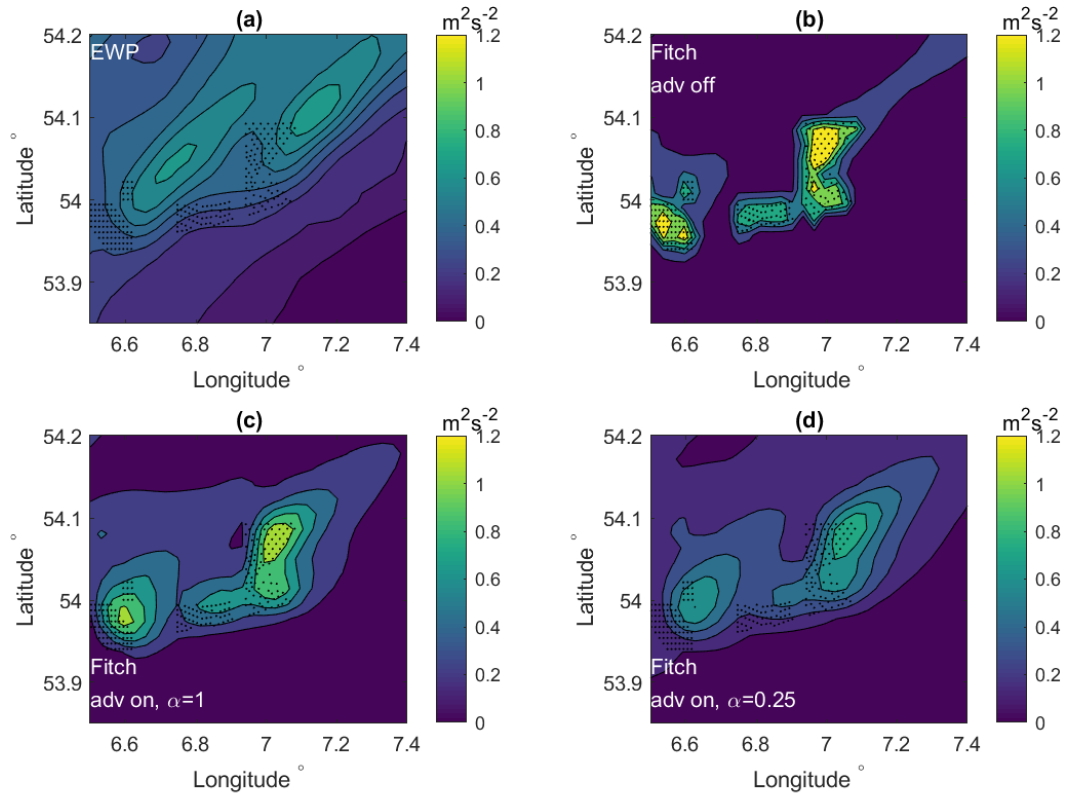

**Figure 14.** Spatial distribution of TKE at 250 m from WRF model at 20171014 15:30 (a) using EWP scheme; (b) using Fitch scheme, advection of (Fitch-off); (c) using Fitch scheme, with advection on and  $\alpha = 1$  (Fitch-on-1); (d) using Fitch scheme, with advection on and  $\alpha = 0.25$  (Fitch-on-0.25)

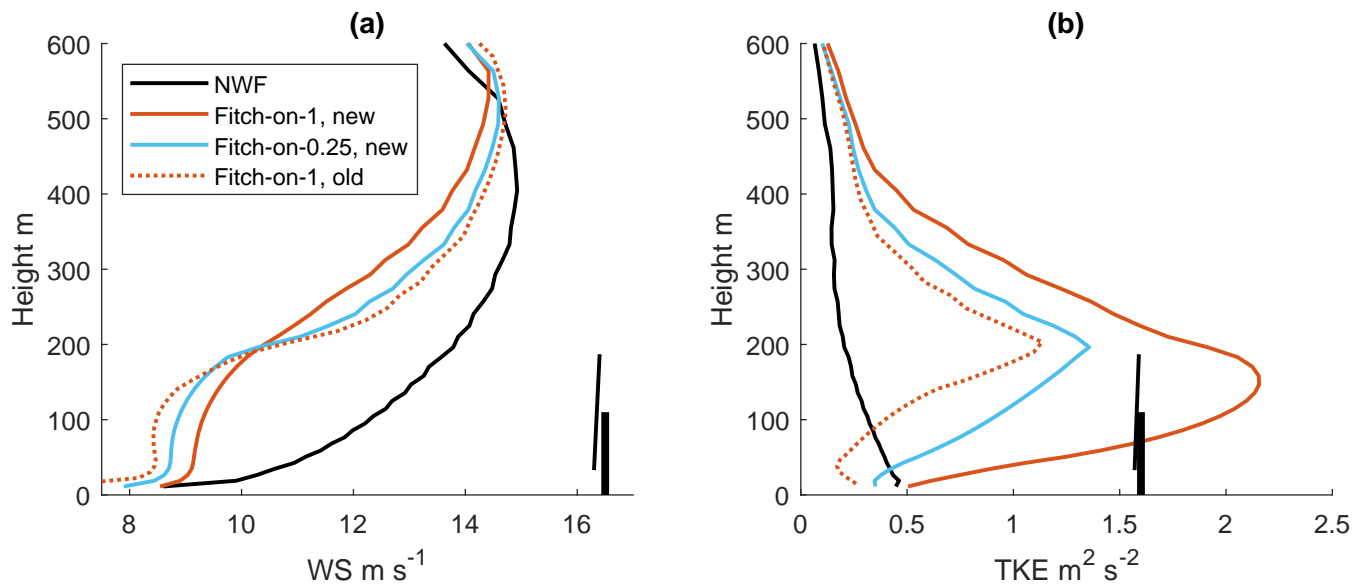

**Figure 15.** Similar to Fig. ??7, comparisons of wind speed and TKE at 250 between measurements and model data from the Fitch-scheme except for EWP, with advection off with  $C_{TKE}=1$  Fitch-on-1, Fitch-on-0.25 and advection on with  $C_{TKE}=1$  and  $C_{TKE}=0.25$  Fitch-old.

**Table 1.** Time of the profile-flights (see track 1-6 in Fig. 2) and transect-flights (see Fig. 2 transect-a).

| Flight nr. | start                   | end                     |
|------------|-------------------------|-------------------------|
| profile 1  | 2017-10-14 13:22:59.700 | 2017-10-14 13:25:08.410 |
| profile 2  | 2017-10-14 14:14:41.600 | 2017-10-14 14:17:10.470 |
| profile 3  | 2017-10-14 15:13:31.260 | 2017-10-14 15:15:53.240 |
| profile 4  | 2017-10-14 16:10:21.570 | 2017-10-14 16:12:49.110 |
| profile 5  | 2017-10-14 16:16:35.240 | 2017-10-14 16:19:55.230 |
| profile 6  | 2017-10-14 16:23:22.060 | 2017-10-14 16:25:05.150 |
| transect 1 | 2017-10-14 14:20:50.860 | 2017-10-14 14:30:12.370 |
| transect 2 | 2017-10-14 14:34:41.180 | 2017-10-14 14:44:37.520 |
| transect 3 | 2017-10-14 14:48:27.970 | 2017-10-14 14:57:43.640 |
| transect 4 | 2017-10-14 15:01:38.120 | 2017-10-14 15:11:34.970 |
| transect 5 | 2017-10-14 15:45:01.130 | 2017-10-14 15:54:05.160 |
| transect 6 | 2017-10-14 15:58:29.630 | 2017-10-14 16:08:34.810 |

**Table 2.** WRF parameterisation, boundary conditions and forcing data employed for the performed simulations.

| <u>Category</u>                  | <u>Subcategory</u>              | <u>Details (option number)</u>                                  |
|----------------------------------|---------------------------------|-----------------------------------------------------------------|
| <u>Schemes</u>                   | <u>PBL</u>                      | <u>MYNN (Nakanishi and Niino, 2009)</u>                         |
|                                  | <u>Surface layer</u>            | <u>Monin-Obukhov similarity</u>                                 |
|                                  | <u>Microphysics</u>             | <u>New Thompson et al. scheme (Thompson et al., 2004)</u>       |
|                                  | <u>Radiation</u>                | <u>RRTMG scheme (Iacono et al., 2008)</u>                       |
|                                  | <u>Cumulus parameterisation</u> | <u>Kain-Fritsch scheme on domain 1 (Kain and Fritsch, 1993)</u> |
| <u>Boundary and forcing data</u> | <u>Dynamical forcing</u>        | <u>ERA-5 on pressure levels every 6 hours</u>                   |
|                                  | <u>Land use data</u>            | <u>CORINE from 2017</u>                                         |
|                                  | <u>Sea surface temperature</u>  | <u>OSTIA (Stark et al., 2007)</u>                               |
|                                  | <u>Land surface model</u>       | <u>NOAH-LSM</u>                                                 |

**Table 3.** Overview on performed simulations.

| <u>Denotation</u>    | <u>Wind Farm Parameterisation</u> | <u>TKE advection</u>                  |
|----------------------|-----------------------------------|---------------------------------------|
| <u>EWP</u>           | <u>EWP</u>                        | <u>on</u>                             |
| <u>EWP-off</u>       | <u>EWP</u>                        | <u>off</u>                            |
| <u>Fitch-on-0.25</u> | <u>Fitch</u>                      | <u>on; <math>\alpha = 0.25</math></u> |
| <u>Fitch-on-1</u>    | <u>Fitch</u>                      | <u>on; <math>\alpha = 1</math></u>    |
| <u>Fitch-off</u>     | <u>Fitch</u>                      | <u>off</u>                            |
| <u>Fitch-on-old</u>  | <u>Fitch</u>                      | <u>on (before bugfix)</u>             |
| <u>NWF</u>           | <u>No</u>                         | <u>on</u>                             |
| <u>NWF-off</u>       | <u>No</u>                         | <u>off</u>                            |

**Table 4.** Wind farm details for all simulated wind farms. Note that for some wind farms the turbine models do not correspond to the actually installed one, since thrust and power curves were not available for all turbines.

| Wind farm                  | Turbines | Turbine Model         | Hub Height [m] | Rotor top [m] | Wind Farm Area [km <sup>2</sup> ] |
|----------------------------|----------|-----------------------|----------------|---------------|-----------------------------------|
| Alpha Ventus               | 12       | M5000-116, Senvion_5M | 90.0, 92.0     | 148.0, 155.0  | 4                                 |
| Amrumbank West             | 80       | SWT-3.6-120           | 88             | 148           | 30                                |
| BARD Offshore              | 80       | M5000-116             | 90             | 148           | 59                                |
| Borkum Riffgrund 1         | 78       | SWT-4.0-120           | 89.5           | 149.5         | 36                                |
| Butendiek                  | 80       | SWT-3.6-120           | 88             | 148           | 31                                |
| Gemini                     | 150      | SWT-4.0-130           | 95             | 160           | 68                                |
| Global Tech I              | 80       | M5000-116             | 90             | 148           | 40                                |
| Gode Wind 1                | 55       | SWT-6.0-154_110       | 110            | 187           | 40                                |
| Gode Wind 2                | 42       | SWT-6.0-154_110       | 110            | 187           | 29                                |
| Horns Rev I                | 80       | V80-2.0               | 67             | 107           | 21                                |
| Horns Rev II               | 91       | SWT-2.3-93            | 68.3           | 114.8         | 33                                |
| Meerwind Süd/Ost           | 80       | SWT-3.6-120           | 88             | 148           | 40                                |
| Nordsee One                | 54       | 6.2M126_90            | 90             | 153           | 30                                |
| OWP Nordergründe           | 18       | 6.2M126_84            | 84             | 147           | 3                                 |
| OWP Nordsee Ost            | 48       | 6.2M126_95            | 95             | 158           | 36                                |
| OWP Veja Mate              | 67       | SWT-6.0-154           | 106            | 183           | 51                                |
| Offshore Windfarm DanTysk  | 80       | SWT-3.6-120           | 88             | 148           | 65                                |
| Offshore Windfarm Sandbank | 72       | SWT-4.0-130           | 95             | 160           | 47                                |
| Offshore Windpark Riffgat  | 30       | SWT-3.6-120           | 88             | 148           | 6                                 |
| Trianel Windpark Borkum    | 40       | M5000-116             | 90             | 148           | 23                                |

**Table 5.** Differences between measurements and simulated wind speed time series at 100 m at FINO 1 between 12:00 and 24:00 on 14 Oct, in terms of mean deficit, standard deviation of the difference and absolute difference. Positive values mean that the measured values are larger.

| Denotation    | $\langle \Delta U \rangle \text{ ms}^{-1}$ | $STD \text{ ms}^{-1}$ | $\langle  \Delta U  \rangle \text{ ms}^{-1}$ |
|---------------|--------------------------------------------|-----------------------|----------------------------------------------|
| EWP           | -0.21                                      | 0.57                  | 0.50                                         |
| Fitch-on-0.25 | 0.59                                       | 0.56                  | 0.65                                         |
| Fitch-on-1    | 0.22                                       | 0.50                  | 0.43                                         |
| Fitch-off     | 0.30                                       | 0.46                  | 0.44                                         |
| NWF           | -1.45                                      | 0.59                  | 1.45                                         |
