# Supplementary material for: A case study of wind farm effects using two wake parameterizationsin WRF (V3.7) in the presence of low level jets
Source: Copernicus journal article supplement (doi:10.5194/gmd-2020-358), 2020-12-22

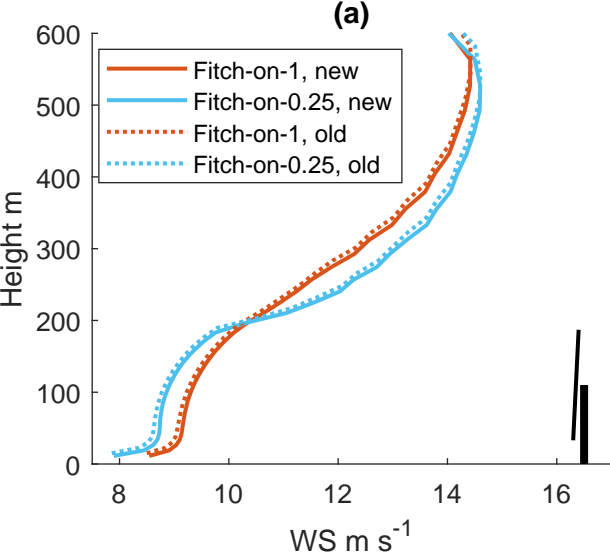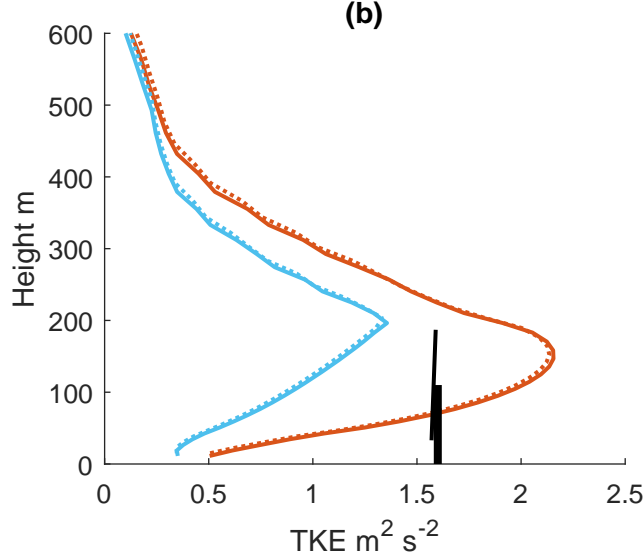

Supplement: Supplementary file [file gmd-2020-358-AC3-supplement.zip]
